# Supplementary material for: First theoretical probe for efficient enhancement of optical nonlinearity via structural modifications into phenylene based D–π–A configured molecules
Source: Royal Society of Chemistry journal article supplement (doi:10.1039/d2ra04844b), 2022-01-01
Supplement: d2ra04844b1.pdf [file d2ra04844b1.pdf]

## Supplementary Information

### First Theoretical Probe for Efficient Enhancement of Optical Nonlinearity *via* Structural Modifications into Phenylene Based D- $\pi$ -A Configured Molecules

Muhammad Khalid\*,<sup>1,2</sup> Salma Naz,<sup>1,2</sup> Khalid Mahmood,<sup>3</sup> Shabbir Hussain,<sup>1</sup> Atualpa Albert Carmo Braga,<sup>4</sup> Riaz Hussain,<sup>5</sup> Ahmed H. Ragab,<sup>6</sup> Saedah R. Al-Mhyawi<sup>7</sup>

<sup>1</sup>Institute of Chemistry, Khwaja Fareed University of Engineering & Information Technology, Rahim Yar Khan, 64200, Pakistan

<sup>2</sup>Centre for Theoretical and Computational Research, Khwaja Fareed University of Engineering & Information Technology, Rahim Yar Khan, 64200, Pakistan

<sup>3</sup>Institute of Chemical Sciences, Bahauddin Zakariya University, Multan 60800, Pakistan

<sup>4</sup>Departamento de Química Fundamental, Instituto de Química, Universidade de São Paulo, Av. Prof. Lineu Prestes, 748, São Paulo, 05508-000, Brazil.

<sup>5</sup>Department of Chemistry, Division of Science and Technology, University of Education Lahore, Pakistan

<sup>6</sup>Department of Chemistry, Faculty of Science, King Khalid University, Abha 62224, Saudi Arabia

<sup>7</sup>Department of Chemistry, College of Science, University of Jeddah, Jeddah 21419, Saudi Arabia

\*Corresponding author E-mail addresses:

Dr. Muhammad Khalid (muhammad.khalid@kfueit.edu.pk; [Khalid@iq.usp.br](mailto:Khalid@iq.usp.br))

**Table S1:** Cartesian coordinates of **PMD-1**

| Atom | X-axis    | Y-axis    | Z-axis    |
|------|-----------|-----------|-----------|
| C    | 0.704765  | 2.205986  | -0.466073 |
| C    | -0.622649 | 1.805633  | -0.472517 |
| C    | -1.021935 | 0.466021  | -0.57113  |
| C    | -0.010276 | -0.512449 | -0.695143 |
| C    | 1.316733  | -0.11052  | -0.705238 |
| C    | 1.71697   | 1.226645  | -0.580787 |
| H    | -1.398702 | 2.557407  | -0.416298 |
| H    | 2.090548  | -0.856162 | -0.830972 |
| C    | -8.753671 | 0.051678  | 0.209526  |

|   |            |           |           |
|---|------------|-----------|-----------|
| C | -8.174755  | -1.063945 | -0.412613 |
| C | -6.799455  | -0.955929 | -0.525213 |
| C | -6.294447  | 0.237451  | 0.004057  |
| H | -8.791392  | -1.887744 | -0.745477 |
| C | -5.678005  | -1.810842 | -1.086019 |
| C | -4.487671  | -0.918335 | -0.790831 |
| C | -3.102725  | -0.989785 | -0.994167 |
| C | -2.436496  | 0.131794  | -0.529579 |
| C | -4.881799  | 0.251894  | -0.164558 |
| H | -2.578254  | -1.805859 | -1.466596 |
| S | -3.555914  | 1.27554   | 0.192308  |
| S | -7.509263  | 1.234807  | 0.643858  |
| C | 3.133349   | 1.554967  | -0.558922 |
| C | 3.778085   | 2.74837   | -0.837817 |
| H | 3.231888   | 3.636918  | -1.114145 |
| C | 5.17184    | 2.64729   | -0.729555 |
| C | 5.59467    | 1.381904  | -0.360777 |
| C | 9.473936   | 1.505952  | -0.154317 |
| C | 8.878094   | 2.712297  | -0.543241 |
| C | 7.494344   | 2.647177  | -0.587495 |
| C | 7.014813   | 1.376629  | -0.264615 |
| S | 8.25396    | 0.2717    | 0.115134  |
| H | 9.478189   | 3.584942  | -0.773417 |
| C | 6.34828    | 3.588691  | -0.908004 |
| S | 4.286502   | 0.30172   | -0.131309 |
| C | 6.28505    | 4.748996  | 0.094096  |
| H | 7.170687   | 5.383793  | -0.000152 |
| H | 5.402395   | 5.366919  | -0.094688 |
| H | 6.234938   | 4.377819  | 1.120096  |
| C | 6.433502   | 4.114303  | -2.34609  |
| H | 7.323777   | 4.736755  | -2.473958 |
| H | 6.481478   | 3.291282  | -3.062863 |
| H | 5.557335   | 4.725536  | -2.580763 |
| C | -5.569753  | -3.148398 | -0.342666 |
| H | -6.469028  | -3.748524 | -0.506522 |
| H | -4.708954  | -3.717215 | -0.706111 |
| H | -5.450499  | -2.991383 | 0.731817  |
| C | -5.848738  | -2.039184 | -2.593171 |
| H | -4.993719  | -2.591164 | -2.994123 |
| H | -6.752907  | -2.621949 | -2.789514 |
| H | -5.927536  | -1.089581 | -3.127481 |
| C | -10.071903 | 0.416103  | 0.544745  |
| H | -10.116284 | 1.389219  | 1.022555  |

|   |            |           |           |
|---|------------|-----------|-----------|
| C | 10.866172  | 1.288309  | -0.135726 |
| H | 11.43298   | 2.074235  | -0.638468 |
| C | -13.004938 | -1.762774 | -0.10373  |
| C | -13.616496 | -0.658804 | 0.492155  |
| C | -14.998062 | -0.664708 | 0.681159  |
| C | -15.701723 | -1.779127 | 0.263228  |
| C | -15.07218  | -2.874402 | -0.332189 |
| C | -13.705651 | -2.878244 | -0.523907 |
| C | -11.292623 | -0.20938  | 0.390105  |
| H | -15.551697 | 0.146268  | 1.134033  |
| H | -13.20448  | -3.721762 | -0.984554 |
| C | -11.548723 | -1.539558 | -0.199966 |
| O | -10.763652 | -2.334049 | -0.679904 |
| C | -12.576052 | 0.343622  | 0.809468  |
| C | -12.840055 | 1.565193  | 1.388572  |
| C | -11.855347 | 2.546273  | 1.685527  |
| N | -11.085209 | 3.370252  | 1.941657  |
| C | -14.148775 | 1.983993  | 1.752459  |
| N | -15.197499 | 2.359205  | 2.062189  |
| C | 13.461388  | -1.242337 | -0.141697 |
| C | 12.526414  | -1.906081 | 0.661595  |
| C | 12.728051  | -3.242306 | 0.996555  |
| C | 13.860356  | -3.864008 | 0.502036  |
| C | 14.791356  | -3.18691  | -0.289067 |
| C | 14.602738  | -1.859804 | -0.620084 |
| C | 11.664996  | 0.243128  | 0.249413  |
| H | 12.048062  | -3.81743  | 1.611357  |
| H | 15.323018  | -1.328187 | -1.231369 |
| C | 11.47463   | -0.943438 | 1.051431  |
| C | 10.6502    | -1.073394 | 2.145735  |
| C | 9.965239   | 0.034712  | 2.710599  |
| N | 9.442987   | 0.932646  | 3.217523  |
| C | 10.532474  | -2.285049 | 2.877556  |
| N | 10.411659  | -3.272192 | 3.467077  |
| C | 13.010649  | 0.147996  | -0.380664 |
| O | 13.591755  | 1.00412   | -1.006754 |
| O | 1.101219   | 3.493558  | -0.351382 |
| O | -0.406512  | -1.801405 | -0.793659 |
| C | 0.553355   | -2.867051 | -0.768633 |
| H | 1.351807   | -2.599258 | -0.065515 |
| C | 0.150072   | 4.531612  | -0.076968 |
| H | -0.607686  | 4.13578   | 0.610583  |
| C | 0.923396   | 5.626142  | 0.628597  |

|   |            |           |           |
|---|------------|-----------|-----------|
| H | 1.392624   | 5.241861  | 1.53628   |
| H | 1.704436   | 6.024855  | -0.025062 |
| H | 0.253868   | 6.445855  | 0.900815  |
| C | -0.498256  | 5.013916  | -1.363111 |
| H | -1.006447  | 4.206881  | -1.89514  |
| H | -1.232578  | 5.794527  | -1.146593 |
| H | 0.261555   | 5.43287   | -2.028749 |
| C | -0.183841  | -4.075961 | -0.231162 |
| H | -0.596587  | -3.866578 | 0.757537  |
| H | -1.004344  | -4.351813 | -0.899668 |
| H | 0.495539   | -4.928406 | -0.15328  |
| C | 1.123393   | -3.10328  | -2.156597 |
| H | 1.604582   | -2.210159 | -2.560888 |
| H | 1.864454   | -3.906739 | -2.128998 |
| H | 0.323929   | -3.397426 | -2.842346 |
| F | -17.019547 | -1.82601  | 0.425622  |
| F | -15.816885 | -3.908289 | -0.707744 |
| F | 14.086093  | -5.143445 | 0.779211  |
| F | 15.859066  | -3.850685 | -0.718669 |

**Table S2:** Cartesian coordinates of **PMDC2**

| <b>Atom</b> | <b>X-axis</b> | <b>Y-axis</b> | <b>Z-axis</b> |
|-------------|---------------|---------------|---------------|
| C           | -0.553625     | 2.002185      | -0.168306     |
| C           | -1.859414     | 1.540761      | -0.254467     |
| C           | -2.189212     | 0.215883      | -0.565766     |
| C           | -1.125232     | -0.676259     | -0.829796     |
| C           | 0.178179      | -0.211823     | -0.761377     |
| C           | 0.508813      | 1.108663      | -0.423323     |
| H           | -2.674408     | 2.233091      | -0.090178     |
| H           | 0.990234      | -0.888335     | -0.993308     |
| C           | -9.892356     | -0.714482     | 0.069459      |
| C           | -9.288594     | -1.670476     | -0.706942     |
| C           | -7.895814     | -1.47595      | -0.800169     |
| C           | -7.46218      | -0.37377      | -0.091493     |
| H           | -9.856291     | -2.46583      | -1.174314     |
| C           | -6.733289     | -2.173753     | -1.48251      |
| C           | -5.585421     | -1.284355     | -1.040606     |
| C           | -4.194151     | -1.253859     | -1.23819      |
| C           | -3.58503      | -0.193821     | -0.594566     |
| C           | -6.03858      | -0.25627      | -0.241961     |

|   |           |           |           |
|---|-----------|-----------|-----------|
| H | -3.629073 | -1.957671 | -1.830093 |
| S | -4.76976  | 0.760952  | 0.287164  |
| S | -8.736891 | 0.450227  | 0.699328  |
| C | 1.90542   | 1.501106  | -0.333372 |
| C | 2.488243  | 2.75544   | -0.412244 |
| H | 1.896661  | 3.646855  | -0.552148 |
| C | 3.884409  | 2.709949  | -0.303818 |
| C | 4.373018  | 1.425398  | -0.134449 |
| C | 8.240334  | 1.715206  | 0.122962  |
| C | 7.580536  | 2.936537  | -0.074694 |
| C | 6.203692  | 2.808432  | -0.140755 |
| C | 5.789765  | 1.478505  | -0.02714  |
| S | 7.084695  | 0.392502  | 0.18402   |
| H | 8.134482  | 3.864299  | -0.159043 |
| C | 5.009634  | 3.727631  | -0.319567 |
| S | 3.121242  | 0.256741  | -0.093784 |
| C | 4.882728  | 4.709712  | 0.852481  |
| H | 5.733022  | 5.397516  | 0.8686    |
| H | 3.968026  | 5.301674  | 0.755078  |
| H | 4.851166  | 4.178452  | 1.806279  |
| C | 5.068578  | 4.478019  | -1.655531 |
| H | 5.924296  | 5.159114  | -1.674747 |
| H | 5.161777  | 3.782274  | -2.492599 |
| H | 4.160882  | 5.0711    | -1.799527 |
| C | -6.558659 | -3.606459 | -0.963459 |
| H | -7.426302 | -4.218939 | -1.226478 |
| H | -5.671109 | -4.067862 | -1.4066   |
| H | -6.445246 | -3.616116 | 0.123036  |
| C | -6.892834 | -2.165365 | -3.007895 |
| H | -6.012168 | -2.603403 | -3.486915 |
| H | -7.767286 | -2.75149  | -3.306046 |
| H | -7.0164   | -1.146141 | -3.381287 |
| C | 9.639672  | 1.57048   | 0.114665  |
| H | 10.163504 | 2.458532  | -0.243966 |
| C | 12.363379 | -0.788395 | -0.303631 |
| C | 11.469276 | -1.62308  | 0.377057  |
| C | 11.743549 | -2.983162 | 0.490166  |
| C | 12.904905 | -3.454673 | -0.09528  |
| C | 13.794117 | -2.609167 | -0.76178  |
| C | 13.533319 | -1.257616 | -0.872219 |
| C | 10.494382 | 0.516151  | 0.32077   |
| H | 11.098359 | -3.68628  | 1.000549  |
| H | 14.221029 | -0.595523 | -1.385827 |

|   |            |           |           |
|---|------------|-----------|-----------|
| C | 10.369394  | -0.793377 | 0.91433   |
| C | 9.5558     | -1.146719 | 1.967751  |
| C | 8.820562   | -0.184173 | 2.708409  |
| N | 8.258902   | 0.589678  | 3.357961  |
| C | 9.501786   | -2.467965 | 2.485635  |
| N | 9.433456   | -3.544691 | 2.901422  |
| C | 11.837393  | 0.596594  | -0.313416 |
| O | 12.370075  | 1.572684  | -0.790249 |
| O | -0.227411  | 3.275855  | 0.153491  |
| O | -1.454641  | -1.953303 | -1.136717 |
| C | -0.441777  | -2.957941 | -1.263293 |
| H | 0.337748   | -2.764224 | -0.515649 |
| C | -1.233261  | 4.203167  | 0.580647  |
| H | -1.971154  | 3.662582  | 1.186219  |
| C | -0.522196  | 5.209085  | 1.462194  |
| H | -0.035883  | 4.708507  | 2.301671  |
| H | 0.238876   | 5.747788  | 0.890385  |
| H | -1.2354    | 5.938362  | 1.854582  |
| C | -1.903277  | 4.852745  | -0.61804  |
| H | -2.366083  | 4.116098  | -1.278061 |
| H | -2.678853  | 5.548826  | -0.286955 |
| H | -1.164831  | 5.412435  | -1.199032 |
| C | -1.117626  | -4.27256  | -0.93209  |
| H | -1.5477    | -4.240981 | 0.070797  |
| H | -1.918782  | -4.480589 | -1.647026 |
| H | -0.395368  | -5.091533 | -0.978339 |
| C | 0.150261   | -2.946487 | -2.662543 |
| H | 0.585677   | -1.977552 | -2.915975 |
| H | 0.932818   | -3.705316 | -2.749086 |
| H | -0.628212  | -3.170503 | -3.397262 |
| F | 13.199692  | -4.748876 | -0.029628 |
| F | 14.893944  | -3.135879 | -1.290647 |
| N | -11.245913 | -0.592286 | 0.370524  |
| C | -12.185689 | 0.105962  | -0.383747 |
| C | -13.436501 | 0.032637  | 0.262266  |
| C | -14.539193 | 0.658217  | -0.317678 |
| C | -14.374587 | 1.338816  | -1.514113 |
| C | -13.122617 | 1.400529  | -2.136636 |
| C | -12.00946  | 0.785358  | -1.582445 |
| H | -15.512092 | 0.613921  | 0.161031  |
| H | -15.22418  | 1.830483  | -1.975319 |
| H | -13.0187   | 1.940265  | -3.072048 |
| H | -11.037539 | 0.829775  | -2.061298 |

|   |            |           |          |
|---|------------|-----------|----------|
| C | -12.196131 | -2.254508 | 3.550713 |
| C | -13.551549 | -1.906007 | 3.5372   |
| C | -14.079821 | -1.151723 | 2.501035 |
| C | -13.240036 | -0.740583 | 1.466951 |
| C | -11.878483 | -1.104315 | 1.500723 |
| C | -11.338938 | -1.860433 | 2.533597 |
| H | -11.805968 | -2.845205 | 4.372849 |
| H | -14.193739 | -2.231255 | 4.348399 |
| H | -15.131588 | -0.884504 | 2.495353 |
| H | -10.288451 | -2.129304 | 2.539381 |

**Table S3:** Cartesian coordinates of **PMDC3**

| <b>Atom</b> | <b>X-axis</b> | <b>Y-axis</b> | <b>Z-axis</b> |
|-------------|---------------|---------------|---------------|
| C           | -0.124395     | 1.898772      | -0.140979     |
| C           | -1.441059     | 1.470326      | -0.231122     |
| C           | -1.803414     | 0.160462      | -0.568884     |
| C           | -0.761978     | -0.750516     | -0.8562       |
| C           | 0.552449      | -0.318452     | -0.783962     |
| C           | 0.915677      | 0.98624       | -0.41963      |
| H           | -2.238754     | 2.17808       | -0.048544     |
| H           | 1.34742       | -1.008768     | -1.033679     |
| C           | -9.524547     | -0.600833     | 0.078251      |
| C           | -8.946283     | -1.554413     | -0.720216     |
| C           | -7.549591     | -1.391086     | -0.814749     |
| C           | -7.087384     | -0.31461      | -0.084958     |
| H           | -9.534243     | -2.326134     | -1.201959     |
| C           | -6.406284     | -2.101574     | -1.516205     |
| C           | -5.236111     | -1.249041     | -1.060343     |
| C           | -3.845192     | -1.247115     | -1.263346     |
| C           | -3.20877      | -0.215526     | -0.600353     |
| C           | -5.661882     | -0.227645     | -0.23852      |
| H           | -3.299127     | -1.951407     | -1.872285     |
| S           | -4.367242     | 0.748016      | 0.306392      |
| S           | -8.339504     | 0.522628      | 0.727818      |
| C           | 2.321755      | 1.34382       | -0.328219     |
| C           | 2.933805      | 2.585098      | -0.384522     |
| H           | 2.363026      | 3.492996      | -0.503441     |
| C           | 4.329244      | 2.504454      | -0.283946     |
| C           | 4.787946      | 1.205855      | -0.143106     |
| C           | 8.662586      | 1.398367      | 0.099397      |

|   |           |           |           |
|---|-----------|-----------|-----------|
| C | 8.03119   | 2.63869   | -0.069551 |
| C | 6.651094  | 2.544474  | -0.130751 |
| C | 6.206711  | 1.222832  | -0.042329 |
| S | 7.476238  | 0.102829  | 0.140483  |
| H | 8.606853  | 3.554375  | -0.138913 |
| C | 5.478419  | 3.495215  | -0.284542 |
| S | 3.509046  | 0.066609  | -0.11993  |
| C | 5.380353  | 4.455604  | 0.908035  |
| H | 6.247047  | 5.122347  | 0.934199  |
| H | 4.479691  | 5.071218  | 0.827496  |
| H | 5.34027   | 3.905448  | 1.850743  |
| C | 5.549222  | 4.271513  | -1.604997 |
| H | 6.421001  | 4.932167  | -1.614568 |
| H | 5.622001  | 3.591106  | -2.456574 |
| H | 4.65535   | 4.888968  | -1.732321 |
| C | -6.263848 | -3.548664 | -1.028203 |
| H | -7.14668  | -4.134777 | -1.300645 |
| H | -5.388992 | -4.02141  | -1.484446 |
| H | -6.146923 | -3.583946 | 0.057388  |
| C | -6.570867 | -2.057125 | -3.040433 |
| H | -5.702355 | -2.505367 | -3.532046 |
| H | -7.459888 | -2.616125 | -3.347509 |
| H | -6.671684 | -1.027576 | -3.391681 |
| C | 10.058893 | 1.222264  | 0.07482   |
| H | 10.598374 | 2.106331  | -0.270823 |
| C | 12.740578 | -1.15573  | -0.425367 |
| C | 11.821357 | -1.99588  | 0.268215  |
| C | 10.895274 | 0.148032  | 0.248373  |
| C | 10.741579 | -1.172294 | 0.819739  |
| C | 9.922148  | -1.563704 | 1.855912  |
| C | 9.178038  | -0.646164 | 2.639498  |
| N | 8.607456  | 0.093447  | 3.320843  |
| C | 9.907663  | -2.914369 | 2.292085  |
| N | 9.898634  | -4.023676 | 2.618645  |
| C | 12.241299 | 0.234152  | -0.406649 |
| O | 12.762201 | 1.226661  | -0.860086 |
| O | 0.233217  | 3.157459  | 0.206161  |
| O | -1.122544 | -2.012918 | -1.188466 |
| C | -0.134094 | -3.038014 | -1.340131 |
| H | 0.652529  | -2.878436 | -0.591872 |
| C | -0.748556 | 4.098483  | 0.657913  |
| H | -1.496309 | 3.562508  | 1.255492  |
| C | -0.010158 | 5.06843   | 1.557185  |



|   |            |           |           |
|---|------------|-----------|-----------|
| H | 0.468201   | 4.538603  | 2.38317   |
| H | 0.760772   | 5.601316  | 0.993193  |
| H | -0.704226  | 5.80556   | 1.968793  |
| C | -1.408623  | 4.789139  | -0.523249 |
| H | -1.891884  | 4.077797  | -1.196246 |
| H | -2.165853  | 5.496213  | -0.173495 |
| H | -0.659762  | 5.343329  | -1.096128 |
| C | -0.839477  | -4.343139 | -1.033732 |
| H | -1.265082  | -4.322506 | -0.028652 |
| H | -1.647918  | -4.517218 | -1.749552 |
| H | -0.136862  | -5.177683 | -1.100059 |
| C | 0.453029   | -3.01119  | -2.741263 |
| H | 0.910202   | -2.047626 | -2.976118 |
| H | 1.217246   | -3.786142 | -2.846811 |
| H | -0.333173  | -3.201409 | -3.477297 |
| N | -10.873876 | -0.452793 | 0.386889  |
| C | -11.798994 | 0.283708  | -0.348808 |
| C | -13.049209 | 0.226468  | 0.300014  |
| C | -14.138397 | 0.890536  | -0.262392 |
| C | -13.961277 | 1.592525  | -1.444595 |
| C | -12.710117 | 1.637651  | -2.070191 |
| C | -11.610302 | 0.984314  | -1.533337 |
| H | -15.110569 | 0.859257  | 0.218823  |
| H | -14.800275 | 2.114157  | -1.892085 |
| H | -12.596193 | 2.194732  | -2.994202 |
| H | -10.639072 | 1.015768  | -2.014609 |
| C | -11.853757 | -2.159807 | 3.534157  |
| C | -13.200464 | -1.778751 | 3.533095  |
| C | -13.713727 | -0.98996  | 2.515244  |
| C | -12.867572 | -0.576932 | 1.487123  |
| C | -11.515014 | -0.973754 | 1.508086  |
| C | -10.990555 | -1.764599 | 2.522589  |
| H | -11.475286 | -2.777193 | 4.34203   |
| H | -13.847713 | -2.105876 | 4.33951   |
| H | -14.758786 | -0.697558 | 2.519129  |
| H | -9.946801  | -2.058547 | 2.518756  |
| C | 13.817459  | -1.817653 | -0.924505 |
| C | 12.213686  | -3.30462  | 0.291588  |
| S | 13.703561  | -3.493157 | -0.55053  |
| H | 14.661027  | -1.42866  | -1.47561  |
| H | 11.734001  | -4.162777 | 0.737966  |

---

**Table S4:** Cartesian coordinates of **PMDC4**

| <b>Atom</b> | <b>X-axis</b> | <b>Y-axis</b> | <b>Z-axis</b> |
|-------------|---------------|---------------|---------------|
| C           | -0.361115     | 1.918524      | -0.137551     |
| C           | -1.675216     | 1.482677      | -0.230149     |
| C           | -2.029393     | 0.167283      | -0.554624     |
| C           | -0.98196      | -0.742235     | -0.82537      |
| C           | 0.329851      | -0.303213     | -0.750386     |
| C           | 0.684787      | 1.00756       | -0.399371     |
| H           | -2.477284     | 2.188694      | -0.060558     |
| H           | 1.129415      | -0.992719     | -0.987368     |
| C           | -9.74992      | -0.623705     | 0.058532      |
| C           | -9.162793     | -1.58336      | -0.726074     |
| C           | -7.76641      | -1.414321     | -0.814903     |
| C           | -7.313407     | -0.327459     | -0.094774     |
| H           | -9.744466     | -2.363259     | -1.20223      |
| C           | -6.615981     | -2.127172     | -1.502156     |
| C           | -5.452376     | -1.263982     | -1.049567     |
| C           | -4.060418     | -1.257833     | -1.244534     |
| C           | -3.432624     | -0.215721     | -0.58967      |
| C           | -5.887575     | -0.235308     | -0.241744     |
| H           | -3.507611     | -1.966425     | -1.842296     |
| S           | -4.600779     | 0.752655      | 0.299313      |
| S           | -8.573872     | 0.512687      | 0.701886      |
| C           | 2.088359      | 1.37272       | -0.303878     |
| C           | 2.69466       | 2.616709      | -0.369728     |
| H           | 2.120052      | 3.520367      | -0.501534     |
| C           | 4.089492      | 2.544051      | -0.2603       |
| C           | 4.553873      | 1.248886      | -0.103056     |
| C           | 8.425295      | 1.462886      | 0.159753      |
| C           | 7.788134      | 2.699129      | -0.025906     |
| C           | 6.409913      | 2.597639      | -0.094129     |
| C           | 5.971097      | 1.273933      | 0.005786      |
| S           | 7.244254      | 0.161933      | 0.208388      |
| H           | 8.360011      | 3.616648      | -0.101907     |
| C           | 5.23345       | 3.540714      | -0.264922     |
| S           | 3.280353      | 0.103523      | -0.075265     |
| C           | 5.123489      | 4.513345      | 0.916669      |
| H           | 5.986532      | 5.184846      | 0.940504      |
| H           | 4.220183      | 5.12333       | 0.824149      |
| H           | 5.080706      | 3.973351      | 1.865117      |
| C           | 5.307955      | 4.303069      | -1.593303     |
| H           | 6.176247      | 4.968217      | -1.604853     |

|   |           |           |           |
|---|-----------|-----------|-----------|
| H | 5.389315  | 3.614058  | -2.437141 |
| H | 4.41162   | 4.914346  | -1.732361 |
| C | -6.469418 | -3.568015 | -0.997178 |
| H | -7.348023 | -4.161288 | -1.26774  |
| H | -5.589954 | -4.041716 | -1.443457 |
| H | -6.358191 | -3.590641 | 0.08935   |
| C | -6.77249  | -2.100568 | -3.02766  |
| H | -5.899295 | -2.550255 | -3.509555 |
| H | -7.657238 | -2.667137 | -3.333161 |
| H | -6.876191 | -1.075521 | -3.391023 |
| C | 9.820986  | 1.294846  | 0.142238  |
| H | 10.357056 | 2.180163  | -0.205339 |
| C | 12.516375 | -1.066064 | -0.335399 |
| C | 11.604125 | -1.912845 | 0.367971  |
| C | 10.663869 | 0.224733  | 0.323144  |
| C | 10.517316 | -1.088514 | 0.906249  |
| C | 9.693936  | -1.476423 | 1.941956  |
| C | 8.942655  | -0.555544 | 2.713817  |
| N | 8.365976  | 0.188651  | 3.385127  |
| C | 9.683401  | -2.822934 | 2.389238  |
| N | 9.678905  | -3.93003  | 2.723722  |
| C | 12.008758 | 0.31927   | -0.333117 |
| O | 12.518074 | 1.312906  | -0.7943   |
| O | -0.011552 | 3.182695  | 0.196822  |
| O | -1.33489  | -2.009885 | -1.144979 |
| C | -0.341    | -3.032284 | -1.279179 |
| H | 0.440493  | -2.860529 | -0.528231 |
| C | -1.000522 | 4.124855  | 0.63083   |
| H | -1.749494 | 3.592757  | 1.230302  |
| C | -0.272154 | 5.10912   | 1.522639  |
| H | 0.203327  | 4.591786  | 2.358153  |
| H | 0.499825  | 5.638681  | 0.956952  |
| H | -0.972183 | 5.848016  | 1.920726  |
| C | -1.65616  | 4.797783  | -0.562913 |
| H | -2.131982 | 4.076037  | -1.23011  |
| H | -2.418767 | 5.505601  | -0.226637 |
| H | -0.90626  | 5.348382  | -1.137885 |
| C | -1.04238  | -4.336919 | -0.961812 |
| H | -1.473986 | -4.306628 | 0.040458  |
| H | -1.845773 | -4.522942 | -1.680297 |
| H | -0.335675 | -5.168979 | -1.014366 |
| C | 0.254108  | -3.018858 | -2.677113 |
| H | 0.708453  | -2.05606  | -2.920479 |

|   |            |           |           |
|---|------------|-----------|-----------|
| H | 1.022269   | -3.791599 | -2.769351 |
| H | -0.526938  | -3.22101  | -3.415439 |
| N | -11.101481 | -0.479073 | 0.358654  |
| C | -12.026289 | 0.245733  | -0.389025 |
| C | -13.279536 | 0.18878   | 0.253921  |
| C | -14.368973 | 0.842004  | -0.320561 |
| C | -14.189115 | 1.533204  | -1.508693 |
| C | -12.93499  | 1.578235  | -2.128307 |
| C | -11.834834 | 0.935539  | -1.579419 |
| H | -15.343459 | 0.810722  | 0.155942  |
| H | -15.028281 | 2.04634   | -1.965581 |
| H | -12.818984 | 2.126726  | -3.057182 |
| H | -10.861324 | 0.966963  | -2.056068 |
| C | -12.089514 | -2.160001 | 3.517414  |
| C | -13.438007 | -1.785538 | 3.505634  |
| C | -13.949743 | -1.0092   | 2.477488  |
| C | -13.100228 | -0.602097 | 1.449777  |
| C | -11.745931 | -0.992139 | 1.481639  |
| C | -11.22295  | -1.770472 | 2.506507  |
| H | -11.712311 | -2.767627 | 4.333238  |
| H | -14.087885 | -2.107942 | 4.311832  |
| H | -14.996204 | -0.721878 | 2.473113  |
| H | -10.177788 | -2.059378 | 2.51097   |
| C | 13.575938  | -1.759702 | -0.813798 |
| C | 11.986198  | -3.220246 | 0.411297  |
| S | 13.481686  | -3.447466 | -0.427607 |
| H | 11.501206  | -4.069158 | 0.868887  |
| F | 14.609791  | -1.319174 | -1.494582 |

**Table S5:** Cartesian coordinates of **PMDC5**

| <b>Atom</b> | <b>X-axis</b> | <b>Y-axis</b> | <b>Z-axis</b> |
|-------------|---------------|---------------|---------------|
| C           | -0.598674     | 1.930673      | -0.128422     |
| C           | -1.910954     | 1.490291      | -0.22538      |
| C           | -2.259391     | 0.171704      | -0.543002     |
| C           | -1.207804     | -0.736499     | -0.80187      |
| C           | 0.102267      | -0.2931       | -0.722457     |
| C           | 0.451329      | 1.021061      | -0.378251     |
| H           | -2.716063     | 2.195002      | -0.065021     |
| H           | 0.905188      | -0.981768     | -0.950362     |
| C           | -9.980468     | -0.639753     | 0.034868      |
| C           | -9.386352     | -1.602039     | -0.741204     |
| C           | -7.990067     | -1.429111     | -0.8239       |

|   |           |           |           |
|---|-----------|-----------|-----------|
| C | -7.544159 | -0.336682 | -0.107773 |
| H | -9.963167 | -2.386481 | -1.215802 |
| C | -6.833915 | -2.142302 | -1.501125 |
| C | -5.675337 | -1.272884 | -1.047563 |
| C | -4.282398 | -1.263605 | -1.235242 |
| C | -3.661247 | -0.215779 | -0.583179 |
| C | -6.117889 | -0.240884 | -0.248006 |
| H | -3.724286 | -1.973974 | -1.825932 |
| S | -4.836975 | 0.75417   | 0.293996  |
| S | -8.811284 | 0.504015  | 0.677648  |
| C | 1.853235  | 1.391044  | -0.277283 |
| C | 2.456255  | 2.636336  | -0.348759 |
| H | 1.879774  | 3.537288  | -0.490539 |
| C | 3.850606  | 2.568614  | -0.230742 |
| C | 4.317848  | 1.275988  | -0.06125  |
| C | 8.186916  | 1.503438  | 0.222509  |
| C | 7.547318  | 2.73639   | 0.023733  |
| C | 6.169844  | 2.630315  | -0.051588 |
| C | 5.734268  | 1.306056  | 0.055689  |
| S | 7.009476  | 0.199344  | 0.273756  |
| H | 8.116943  | 3.655016  | -0.055742 |
| C | 4.991644  | 3.56861   | -0.236178 |
| S | 3.047534  | 0.127084  | -0.032426 |
| C | 4.872037  | 4.54965   | 0.937496  |
| H | 5.732977  | 5.223841  | 0.961297  |
| H | 3.967523  | 5.156274  | 0.835225  |
| H | 4.825331  | 4.016598  | 1.889679  |
| C | 5.071596  | 4.321288  | -1.569753 |
| H | 5.938005  | 4.988886  | -1.581265 |
| H | 5.159808  | 3.626279  | -2.407964 |
| H | 4.174309  | 4.928875  | -1.718483 |
| C | -6.685468 | -3.579749 | -0.987099 |
| H | -7.560817 | -4.17733  | -1.258728 |
| H | -5.802253 | -4.053237 | -1.426138 |
| H | -6.579751 | -3.595786 | 0.100096  |
| C | -6.982667 | -2.124969 | -3.027539 |
| H | -6.105621 | -2.574681 | -3.502365 |
| H | -7.864071 | -2.696061 | -3.334277 |
| H | -7.087694 | -1.102361 | -3.397337 |
| C | 9.583067  | 1.338953  | 0.215511  |
| H | 10.11919  | 2.222477  | -0.136494 |
| C | 12.28879  | -1.023114 | -0.221534 |
| C | 11.374116 | -1.860654 | 0.483814  |

|   |            |           |           |
|---|------------|-----------|-----------|
| C | 10.426905  | 0.27236   | 0.411876  |
| C | 10.280301  | -1.035586 | 1.006926  |
| C | 9.452351   | -1.417118 | 2.040895  |
| C | 8.691508   | -0.492488 | 2.799065  |
| N | 8.106867   | 0.255015  | 3.459652  |
| C | 9.44487    | -2.759607 | 2.500718  |
| N | 9.443151   | -3.863495 | 2.845541  |
| C | 11.775585  | 0.361707  | -0.235059 |
| O | 12.288746  | 1.350101  | -0.703911 |
| O | -0.254678  | 3.198079  | 0.199353  |
| O | -1.555266  | -2.007241 | -1.115035 |
| C | -0.557715  | -3.027685 | -1.236504 |
| H | 0.218949   | -2.848519 | -0.482284 |
| C | -1.248803  | 4.140212  | 0.621523  |
| H | -1.999558  | 3.609931  | 1.22037   |
| C | -0.528303  | 5.132575  | 1.510737  |
| H | -0.056093  | 4.622292  | 2.352419  |
| H | 0.245354   | 5.660523  | 0.945836  |
| H | -1.232689  | 5.872117  | 1.899829  |
| C | -1.899707  | 4.803188  | -0.580352 |
| H | -2.369606  | 4.075583  | -1.245378 |
| H | -2.666309  | 5.510926  | -0.253107 |
| H | -1.14823   | 5.352213  | -1.154771 |
| C | -1.257208  | -4.332121 | -0.914209 |
| H | -1.694666  | -4.296199 | 0.085334  |
| H | -2.055918  | -4.525365 | -1.635998 |
| H | -0.547858  | -5.162489 | -0.956987 |
| C | 0.045391   | -3.022126 | -2.631058 |
| H | 0.498435   | -2.059733 | -2.878425 |
| H | 0.816233   | -3.793293 | -2.713582 |
| H | -0.730815  | -3.231554 | -3.372452 |
| N | -11.333967 | -0.497778 | 0.327432  |
| C | -12.25725  | 0.220261  | -0.428613 |
| C | -13.51355  | 0.162616  | 0.208284  |
| C | -14.602117 | 0.809423  | -0.37504  |
| C | -14.418424 | 1.495091  | -1.565788 |
| C | -13.161328 | 1.540922  | -2.179294 |
| C | -12.061944 | 0.904547  | -1.621564 |
| H | -15.578902 | 0.777481  | 0.096689  |
| H | -15.256879 | 2.003207  | -2.02954  |
| H | -13.042355 | 2.084998  | -3.110388 |
| H | -11.086139 | 0.936604  | -2.093455 |
| C | -12.332681 | -2.165691 | 3.489726  |

|    |            |           |           |
|----|------------|-----------|-----------|
| C  | -13.682274 | -1.795593 | 3.469208  |
| C  | -14.191241 | -1.026138 | 2.434533  |
| C  | -13.337815 | -0.621578 | 1.409062  |
| C  | -11.982477 | -1.007148 | 1.449765  |
| C  | -11.462236 | -1.778568 | 2.48123   |
| H  | -11.957704 | -2.767937 | 4.31055   |
| H  | -14.33521  | -2.115951 | 4.273749  |
| H  | -15.238569 | -0.742177 | 2.423404  |
| H  | -10.416198 | -2.064109 | 2.492448  |
| C  | 13.367544  | -1.701973 | -0.69322  |
| C  | 11.766837  | -3.166011 | 0.541578  |
| S  | 13.265053  | -3.383496 | -0.283485 |
| H  | 11.284736  | -4.013719 | 1.00533   |
| Cl | 14.698095  | -1.101871 | -1.56921  |

**Table S6:** Cartesian coordinates of **PMDC6**

| <b>Atom</b> | <b>X-axis</b> | <b>Y-axis</b> | <b>Z-axis</b> |
|-------------|---------------|---------------|---------------|
| C           | 1.153915      | -1.785623     | -0.098628     |
| C           | 2.482909      | -1.396859     | -0.189463     |
| C           | 2.885144      | -0.118657     | -0.596092     |
| C           | 1.873398      | 0.800605      | -0.955219     |
| C           | 0.546949      | 0.408305      | -0.879002     |
| C           | 0.143568      | -0.863293     | -0.445854     |
| H           | 3.258731      | -2.112654     | 0.047678      |
| H           | -0.22563      | 1.102771      | -1.181782     |
| C           | 10.60927      | 0.489813      | 0.161426      |
| C           | 10.071732     | 1.404147      | -0.708201     |
| C           | 8.672881      | 1.272201      | -0.81865      |
| C           | 8.168594      | 0.257565      | -0.030448     |
| H           | 10.689419     | 2.126186      | -1.228231     |
| C           | 7.562743      | 1.962611      | -1.589956     |
| C           | 6.362193      | 1.16983       | -1.106125     |
| C           | 4.975879      | 1.189666      | -1.337166     |
| C           | 4.300138      | 0.219269      | -0.622688     |
| C           | 6.745111      | 0.193556      | -0.211434     |
| H           | 4.460242      | 1.866598      | -2.001204     |
| S           | 5.415241      | -0.712236     | 0.3679        |
| S           | 9.382164      | -0.555448     | 0.861458      |
| C           | -1.272895     | -1.177214     | -0.356279     |
| C           | -1.91771      | -2.40361      | -0.359841     |
| H           | -1.370559     | -3.331203     | -0.426413     |
| C           | -3.311124     | -2.280304     | -0.284113     |

|   |            |           |           |
|---|------------|-----------|-----------|
| C | -3.736957  | -0.963988 | -0.214614 |
| C | -7.614238  | -1.02272  | -0.021692 |
| C | -7.007785  | -2.294836 | -0.09915  |
| C | -5.631861  | -2.248292 | -0.163102 |
| C | -5.156654  | -0.930888 | -0.138394 |
| S | -6.38461   | 0.247316  | -0.037794 |
| H | -7.612074  | -3.194872 | -0.107936 |
| C | -4.486725  | -3.239073 | -0.260075 |
| S | -2.426268  | 0.140212  | -0.230671 |
| C | -4.430537  | -4.157088 | 0.967401  |
| H | -5.317662  | -4.795572 | 1.008199  |
| H | -3.549154  | -4.803253 | 0.919724  |
| H | -4.38124   | -3.574766 | 1.890347  |
| C | -4.56334   | -4.062875 | -1.551574 |
| H | -5.453892  | -4.697815 | -1.547917 |
| H | -4.60673   | -3.413303 | -2.42877  |
| H | -3.685922  | -4.709508 | -1.643948 |
| C | 7.446775   | 3.441337  | -1.199302 |
| H | 8.349681   | 3.987264  | -1.48885  |
| H | 6.593996   | 3.904297  | -1.70473  |
| H | 7.307954   | 3.549757  | -0.121147 |
| C | 7.75773    | 1.815615  | -3.104097 |
| H | 6.911294   | 2.251786  | -3.642792 |
| H | 8.666783   | 2.332167  | -3.426416 |
| H | 7.839782   | 0.76342   | -3.386286 |
| C | -9.012929  | -0.926302 | 0.050411  |
| H | -9.469106  | -1.907184 | 0.014372  |
| C | -11.833036 | 1.407707  | 0.5603    |
| C | -10.727169 | 2.299223  | 0.504201  |
| C | -9.910853  | 0.119672  | 0.148817  |
| C | -9.501504  | 1.535573  | 0.243813  |
| C | -11.360896 | 0.029328  | 0.288379  |
| O | 0.756783   | -3.012255 | 0.313377  |
| O | 2.273706   | 2.030674  | -1.355416 |
| C | 1.315421   | 3.067143  | -1.59757  |
| H | 0.510019   | 2.97832   | -0.857524 |
| C | 1.708178   | -3.959058 | 0.815759  |
| H | 2.465039   | -3.418043 | 1.397138  |
| C | 0.934674   | -4.867451 | 1.749042  |
| H | 0.463453   | -4.288475 | 2.545653  |
| H | 0.154689   | -5.403792 | 1.201054  |
| H | 1.60414    | -5.604083 | 2.200305  |
| C | 2.359545   | -4.719031 | -0.326976 |



|   |            |           |           |
|---|------------|-----------|-----------|
| H | 2.868132   | -4.051584 | -1.025764 |
| H | 3.094115   | -5.429827 | 0.061377  |
| H | 1.601118   | -5.277953 | -0.882364 |
| C | 2.048651   | 4.37202   | -1.364368 |
| H | 2.453534   | 4.409065  | -0.35121  |
| H | 2.875478   | 4.476948  | -2.072586 |
| H | 1.369686   | 5.217324  | -1.502115 |
| C | 0.755955   | 2.959812  | -3.006065 |
| H | 0.27872    | 1.994112  | -3.185583 |
| H | 0.014156   | 3.744132  | -3.179937 |
| H | 1.561287   | 3.080607  | -3.736039 |
| N | 11.946893  | 0.334228  | 0.513831  |
| C | 12.858201  | -0.516696 | -0.106615 |
| C | 14.097711  | -0.422521 | 0.558278  |
| C | 15.17251   | -1.185858 | 0.104706  |
| C | 14.991934  | -2.019923 | -0.987752 |
| C | 13.751778  | -2.098545 | -1.631636 |
| C | 12.66643   | -1.348565 | -1.202418 |
| H | 16.136309  | -1.128622 | 0.600148  |
| H | 15.8197    | -2.619804 | -1.349959 |
| H | 13.635093  | -2.759    | -2.484441 |
| H | 11.704087  | -1.405062 | -1.699016 |
| C | 12.929579  | 2.377864  | 3.452661  |
| C | 14.261997  | 1.956047  | 3.52702   |
| C | 14.765363  | 1.032843  | 2.623702  |
| C | 13.923751  | 0.525564  | 1.634723  |
| C | 12.585976  | 0.966336  | 1.577687  |
| C | 12.071287  | 1.890883  | 2.477562  |
| H | 12.558538  | 3.100593  | 4.171732  |
| H | 14.905912  | 2.357694  | 4.301805  |
| H | 15.799244  | 0.709034  | 2.68606   |
| H | 11.038468  | 2.215405  | 2.415512  |
| C | -13.014209 | 2.046103  | 0.81368   |
| C | -11.069298 | 3.597818  | 0.709289  |
| S | -12.772932 | 3.74212   | 0.982711  |
| C | -12.262171 | -0.992079 | 0.202501  |
| O | -8.373026  | 1.973421  | 0.144412  |
| N | -12.1266   | -2.360263 | -0.170606 |
| N | -13.681732 | -0.70917  | 0.500465  |
| O | -11.077335 | -2.745627 | -0.663563 |
| O | -13.101638 | -3.067492 | 0.009575  |
| O | -14.401304 | -0.480927 | -0.444744 |
| O | -14.002902 | -0.685067 | 1.666812  |

|    |              |          |          |
|----|--------------|----------|----------|
| Cl | -10.06456500 | 4.971026 | 0.721606 |
| H  | -14.016854   | 1.661968 | 0.926665 |

**Table S7:** Cartesian coordinates of **PMDC7**

| <b>Atom</b> | <b>X-axis</b> | <b>Y-axis</b> | <b>Z-axis</b> |
|-------------|---------------|---------------|---------------|
| C           | 0.019352      | 1.964269      | -0.103772     |
| C           | -1.293169     | 1.524519      | -0.194446     |
| C           | -1.643846     | 0.214267      | -0.544407     |
| C           | -0.595003     | -0.681924     | -0.844538     |
| C           | 0.716249      | -0.237143     | -0.772326     |
| C           | 1.067873      | 1.066005      | -0.394513     |
| H           | -2.097637     | 2.222083      | -0.002053     |
| H           | 1.517588      | -0.916073     | -1.0327       |
| C           | -9.35525      | -0.637332     | 0.130661      |
| C           | -8.771187     | -1.571809     | -0.685924     |
| C           | -7.376556     | -1.393519     | -0.783826     |
| C           | -6.921169     | -0.324802     | -0.038581     |
| H           | -9.35373      | -2.341033     | -1.178208     |
| C           | -6.229273     | -2.080136     | -1.502495     |
| C           | -5.065626     | -1.222958     | -1.038573     |
| C           | -3.675577     | -1.202705     | -1.250414     |
| C           | -3.046111     | -0.175874     | -0.574527     |
| C           | -5.497289     | -0.220279     | -0.197703     |
| H           | -3.125615     | -1.890918     | -1.874141     |
| S           | -4.20882      | 0.759598      | 0.355929      |
| S           | -8.177729     | 0.486186      | 0.793948      |
| C           | 2.471866      | 1.43751       | -0.303201     |
| C           | 3.075178      | 2.680408      | -0.36138      |
| H           | 2.497994      | 3.584518      | -0.480889     |
| C           | 4.47416       | 2.610097      | -0.263322     |
| C           | 4.941617      | 1.318078      | -0.12327      |
| C           | 8.828264      | 1.54965       | 0.114831      |
| C           | 8.189187      | 2.776837      | -0.029755     |
| C           | 6.800131      | 2.663675      | -0.111105     |
| C           | 6.367008      | 1.349068      | -0.028499     |
| S           | 7.657455      | 0.240688      | 0.149283      |
| H           | 8.747172      | 3.705205      | -0.071864     |
| C           | 5.620123      | 3.606022      | -0.270225     |
| S           | 3.672365      | 0.170004      | -0.09827      |

|   |           |           |           |
|---|-----------|-----------|-----------|
| C | 5.517522  | 4.578282  | 0.911438  |
| H | 6.383165  | 5.247114  | 0.935345  |
| H | 4.616504  | 5.192335  | 0.822496  |
| H | 5.472472  | 4.03688   | 1.859159  |
| C | 5.689098  | 4.369801  | -1.598213 |
| H | 6.558476  | 5.033973  | -1.615076 |
| H | 5.764984  | 3.679775  | -2.441688 |
| H | 4.79239   | 4.981643  | -1.733334 |
| C | -6.068845 | -3.533376 | -1.039024 |
| H | -6.946513 | -4.12474  | -1.316945 |
| H | -5.190909 | -3.988864 | -1.506771 |
| H | -5.946294 | -3.584894 | 0.045303  |
| C | -6.401865 | -2.012679 | -3.02494  |
| H | -5.530772 | -2.443005 | -3.527888 |
| H | -7.286187 | -2.576377 | -3.33713  |
| H | -6.515595 | -0.978633 | -3.358618 |
| C | 10.237535 | 1.376917  | 0.220715  |
| H | 10.786458 | 2.314429  | 0.188454  |
| C | 11.954378 | -2.061028 | 0.54398   |
| C | 12.067119 | -3.441016 | 0.629251  |
| C | 14.336076 | -1.336049 | 0.64087   |
| C | 10.992068 | 0.260763  | 0.349823  |
| H | 14.830673 | -0.911092 | -0.236558 |
| O | 0.367015  | 3.224496  | 0.254722  |
| O | -0.943191 | -1.945052 | -1.189619 |
| C | 0.056103  | -2.956146 | -1.360067 |
| H | 0.845096  | -2.797762 | -0.614117 |
| C | -0.623019 | 4.151437  | 0.712354  |
| H | -1.365522 | 3.605299  | 1.307588  |
| C | 0.105965  | 5.123991  | 1.616855  |
| H | 0.589817  | 4.593824  | 2.439462  |
| H | 0.872053  | 5.666422  | 1.055327  |
| H | -0.594724 | 5.852549  | 2.032669  |
| C | -1.29193  | 4.843424  | -0.463407 |
| H | -1.767322 | 4.131043  | -1.14084  |
| H | -2.056924 | 5.539685  | -0.108662 |
| H | -0.549369 | 5.409446  | -1.032996 |
| C | -0.632466 | -4.273488 | -1.067678 |
| H | -1.052953 | -4.271231 | -0.060202 |
| H | -1.442881 | -4.44706  | -1.781429 |
| H | 0.079321  | -5.098893 | -1.149087 |
| C | 0.635741  | -2.904188 | -2.763627 |
| H | 1.079983  | -1.932064 | -2.987593 |

|   |            |           |           |
|---|------------|-----------|-----------|
| H | 1.408896   | -3.668186 | -2.883074 |
| H | -0.151959  | -3.094255 | -3.498172 |
| N | -10.704623 | -0.508573 | 0.449101  |
| C | -11.639012 | 0.24006   | -0.261737 |
| C | -12.886055 | 0.15424   | 0.390221  |
| C | -13.983144 | 0.824448  | -0.149127 |
| C | -13.81693  | 1.56046   | -1.31206  |
| C | -12.568826 | 1.633408  | -1.941252 |
| C | -11.461346 | 0.974774  | -1.427222 |
| H | -14.953004 | 0.771518  | 0.334896  |
| H | -14.662159 | 2.087197  | -1.741526 |
| H | -12.463519 | 2.216729  | -2.849985 |
| H | -10.492424 | 1.027435  | -1.911272 |
| C | -11.656142 | -2.311302 | 3.551078  |
| C | -13.006127 | -1.942128 | 3.566355  |
| C | -13.530601 | -1.129574 | 2.573214  |
| C | -12.692574 | -0.680548 | 1.553519  |
| C | -11.336517 | -1.066094 | 1.557593  |
| C | -10.800865 | -1.880413 | 2.547432  |
| H | -11.268808 | -2.947788 | 4.339724  |
| H | -13.647008 | -2.297434 | 4.36593   |
| H | -14.578114 | -0.846466 | 2.589675  |
| H | -9.754586  | -2.16477  | 2.530747  |
| S | 10.35173   | -1.375464 | 0.412983  |
| C | 10.874026  | -4.207451 | 0.597025  |
| N | 9.894447   | -4.822197 | 0.569342  |
| C | 13.269083  | -4.176255 | 0.748133  |
| N | 14.230672  | -4.813277 | 0.84606   |
| N | 12.907275  | -1.102496 | 0.545047  |
| H | 14.55521   | -2.396432 | 0.688647  |
| H | 14.724153  | -0.852544 | 1.541514  |
| C | 12.450391  | 0.226905  | 0.451755  |
| C | 13.281303  | 1.281376  | 0.460881  |
| H | 12.887224  | 2.285104  | 0.391663  |
| H | 14.353313  | 1.177525  | 0.537621  |

**Table S8:** Cartesian coordinates of **PMDC8**

| <b>Atom</b> | <b>X-axis</b> | <b>Y-axis</b> | <b>Z-axis</b> |
|-------------|---------------|---------------|---------------|
| C           | 0.464568      | 1.774976      | -0.14048      |
| C           | -0.86167      | 1.376212      | -0.223161     |
| C           | -1.254362     | 0.069918      | -0.541357     |
| C           | -0.235082     | -0.867743     | -0.816514     |

|   |           |           |           |
|---|-----------|-----------|-----------|
| C | 1.089885  | -0.465102 | -0.751153 |
| C | 1.483082  | 0.835201  | -0.405519 |
| H | -1.643109 | 2.104413  | -0.050496 |
| H | 1.869212  | -1.176029 | -0.992246 |
| C | -8.989747 | -0.513575 | 0.138725  |
| C | -8.43599  | -1.483936 | -0.656852 |
| C | -7.036173 | -1.353513 | -0.756329 |
| C | -6.546747 | -0.284544 | -0.03337  |
| H | -9.043067 | -2.243968 | -1.133497 |
| C | -5.91158  | -2.09256  | -1.458623 |
| C | -4.720764 | -1.264498 | -1.01106  |
| C | -3.330615 | -1.29465  | -1.220351 |
| C | -2.668572 | -0.274668 | -0.565455 |
| C | -5.120086 | -0.230195 | -0.192653 |
| H | -2.802992 | -2.013889 | -1.828181 |
| S | -3.800905 | 0.718551  | 0.342116  |
| S | -7.776688 | 0.584724  | 0.779775  |
| C | 2.898054  | 1.163145  | -0.319952 |
| C | 3.540768  | 2.383919  | -0.416718 |
| H | 2.993122  | 3.301361  | -0.568964 |
| C | 4.935986  | 2.272472  | -0.310066 |
| C | 5.361694  | 0.971164  | -0.124349 |
| C | 9.247511  | 1.086489  | 0.123879  |
| C | 8.650005  | 2.329845  | -0.066881 |
| C | 7.260779  | 2.258416  | -0.150385 |
| C | 6.785821  | 0.958642  | -0.024306 |
| S | 8.036864  | -0.184167 | 0.198087  |
| H | 9.241425  | 3.235287  | -0.13816  |
| C | 6.112038  | 3.231382  | -0.346336 |
| S | 4.055705  | -0.134646 | -0.067091 |
| C | 6.036271  | 4.246229  | 0.801218  |
| H | 6.922341  | 4.887911  | 0.805467  |
| H | 5.155234  | 4.884641  | 0.687411  |
| H | 5.971742  | 3.739623  | 1.766879  |
| C | 6.208616  | 3.946951  | -1.699361 |
| H | 7.09852   | 4.582308  | -1.734965 |
| H | 6.265333  | 3.226959  | -2.518956 |
| H | 5.332091  | 4.581837  | -1.85831  |
| C | -5.799634 | -3.54026  | -0.964614 |
| H | -6.696192 | -4.107947 | -1.231329 |
| H | -4.936987 | -4.034308 | -1.421573 |
| H | -5.679668 | -3.573108 | 0.120733  |
| C | -6.080729 | -2.051304 | -2.982417 |

|   |            |           |           |
|---|------------|-----------|-----------|
| H | -5.224024  | -2.520625 | -3.475101 |
| H | -6.982998  | -2.591862 | -3.283946 |
| H | -6.160038  | -1.021288 | -3.337789 |
| C | 10.640917  | 0.858961  | 0.242996  |
| H | 11.266975  | 1.747516  | 0.177752  |
| C | 12.387341  | -2.564722 | 0.764068  |
| C | 14.720584  | -1.790448 | 0.824224  |
| C | 11.340345  | -0.287351 | 0.425706  |
| H | 15.210654  | -0.821277 | 0.741658  |
| O | 0.853035   | 3.031242  | 0.186516  |
| O | -0.624789  | -2.126633 | -1.131551 |
| C | 0.340331   | -3.173725 | -1.277531 |
| H | 1.133347   | -3.025092 | -0.53373  |
| C | -0.106604  | 4.002574  | 0.617598  |
| H | -0.867605  | 3.496772  | 1.224954  |
| C | 0.653087   | 4.973455  | 1.498168  |
| H | 1.117502   | 4.449334  | 2.335707  |
| H | 1.437778   | 5.475186  | 0.924671  |
| H | -0.023563  | 5.73562   | 1.892956  |
| C | -0.75016   | 4.685177  | -0.577537 |
| H | -1.248307  | 3.971635  | -1.237194 |
| H | -1.491868  | 5.415683  | -0.242854 |
| H | 0.01162    | 5.211058  | -1.160043 |
| C | -0.392297  | -4.460479 | -0.957191 |
| H | -0.813633  | -4.42167  | 0.049183  |
| H | -1.207354  | -4.622542 | -1.668316 |
| H | 0.291335   | -5.311021 | -1.019084 |
| C | 0.923083   | -3.172467 | -2.680821 |
| H | 1.400253   | -2.221154 | -2.925472 |
| H | 1.669958   | -3.964746 | -2.782082 |
| H | 0.130261   | -3.351964 | -3.412473 |
| N | -10.334321 | -0.33398  | 0.452335  |
| C | -11.242974 | 0.430257  | -0.275248 |
| C | -12.492524 | 0.399345  | 0.376753  |
| C | -13.566503 | 1.094107  | -0.177805 |
| C | -13.375336 | 1.799818  | -1.355587 |
| C | -12.12516  | 1.81827   | -1.984583 |
| C | -11.040386 | 1.134193  | -1.455543 |
| H | -14.537846 | 1.08343   | 0.306003  |
| H | -14.202392 | 2.345204  | -1.796971 |
| H | -12.000063 | 2.378719  | -2.905116 |
| H | -10.070023 | 1.14471   | -1.93946  |
| C | -11.347162 | -2.039102 | 3.589978  |

|   |            |           |          |
|---|------------|-----------|----------|
| C | -12.684151 | -1.625155 | 3.595674 |
| C | -13.180708 | -0.816573 | 2.585082 |
| C | -12.327544 | -0.416961 | 1.557435 |
| C | -10.985049 | -0.847059 | 1.571432 |
| C | -10.477358 | -1.657837 | 2.578743 |
| H | -10.981707 | -2.671429 | 4.392288 |
| H | -13.337011 | -1.942219 | 4.401603 |
| H | -14.21826  | -0.498626 | 2.594198 |
| H | -9.44107   | -1.97701  | 2.56951  |
| S | 10.755476  | -1.929745 | 0.582966 |
| N | 13.297017  | -1.553067 | 0.703416 |
| H | 15.056291  | -2.460054 | 0.03033  |
| H | 14.941699  | -2.252399 | 1.788084 |
| C | 12.804812  | -0.252585 | 0.517043 |
| S | 12.705299  | -4.159495 | 0.973371 |
| O | 13.514594  | 0.724161  | 0.447209 |

**Table S9:** Calculated energies ( $E$ ) and energy gap ( $\Delta E$ ) of HOMO-1, LUMO+1, HOMO-2 and LUMO+2 for **PMD-1** and **PMDC2-PMDC8**

| Compounds    | HOMO-1 | LUMO+<br>1 | $\Delta E$ | HOMO-2 | LUMO+<br>2 | $\Delta E$ |
|--------------|--------|------------|------------|--------|------------|------------|
|              |        |            |            |        |            |            |
| <b>PMD-1</b> | -6.153 | -3.269     | 2.884      | -6.503 | -2.745     | 3.758      |
| <b>PMDC2</b> | -6.068 | -2.647     | 3.421      | -6.208 | -1.991     | 4.217      |
| <b>PMDC3</b> | -6.048 | -2.282     | 3.766      | -6.205 | -1.944     | 4.261      |
| <b>PMDC4</b> | -6.065 | -2.295     | 3.770      | -6.208 | -1.938     | 4.270      |
| <b>PMDC5</b> | -6.608 | -2.342     | 4.266      | -6.208 | -2.000     | 4.208      |
| <b>PMDC6</b> | -6.101 | -2.659     | 3.442      | -6.209 | -2.493     | 3.716      |
| <b>PMDC7</b> | -5.781 | -1.861     | 3.920      | -6.190 | -1.346     | 4.844      |
| <b>PMDC8</b> | -5.919 | -1.921     | 3.998      | -6.198 | -1.351     | 4.847      |

$E$ =energy,  $\Delta E(eV)=E_{LUMO}-E_{HOMO}$ ; HOMO=highest occupied molecular orbital; LUMO=lowest unoccupied molecular orbital, MO=molecular orbital, Units in eV

**Table S10:** Wave length, excitation energy and oscillator strength of **PMD-1** and **PMDC2-PMDC8** in gaseous phase

| Compounds    | $\lambda$ (nm) | $E$ (eV) | $f_{os}$ | MO contributions                                            |
|--------------|----------------|----------|----------|-------------------------------------------------------------|
|              |                |          |          |                                                             |
| <b>PMD-1</b> | 671.128        | 1.847    | 2.508    | H→L (96%), H-1→L+1 (3%)                                     |
|              | 578.284        | 2.144    | 0.105    | H→L+1 (97%)                                                 |
|              | 507.529        | 2.443    | 0.111    | H-1→L (88%), H→L+3 (6%)                                     |
|              | 486.594        | 2.548    | 0.239    | H→L+2 (86%), H-1→L+2 (3%), H-1→L+3 (6%)                     |
|              | 470.225        | 2.637    | 0.397    | H-1→L+1 (82%), H-2→L (2%), H→L (3%), H→L+3 (9%), H→L+4 (2%) |
|              | 464.273        | 2.671    | 0.018    | H→L+3 (71%), H-1→L (9%), H-1→L+1 (7%), H-                   |

|              |         |       |       |                                                       |
|--------------|---------|-------|-------|-------------------------------------------------------|
|              |         |       |       | 1→L+2 (4%), H→L+2 (2%)                                |
|              | 669.968 | 1.851 | 1.222 | H→L (98%)                                             |
|              | 509.468 | 2.434 | 0.187 | H-2→L (39%), H-1→L (51%), H→L+1 (3%), H→L+2 (3%)      |
| <b>PMDC2</b> | 499.533 | 2.482 | 0.590 | H→L+1 (88%), H-2→L+1 (2%), H-1→L+1 (3%)               |
|              | 473.891 | 2.616 | 0.002 | H-2→L (55%), H-1→L (44%)                              |
|              | 438.153 | 2.830 | 0.023 | H-4→L (96%)                                           |
|              | 433.648 | 2.859 | 0.000 | H-3→L (99%)                                           |
|              | 659.561 | 1.880 | 1.334 | H→L (98%)                                             |
|              | 503.878 | 2.461 | 0.338 | H-1→L (87%), H-2→L (6%), H→L+1 (3%)                   |
|              | 463.666 | 2.674 | 0.004 | H-2→L (92%), H-1→L (7%)                               |
| <b>PMDC3</b> | 445.458 | 2.783 | 0.650 | H→L+1 (89%), H-1→L (2%), H-1→L+1 (2%), H-1→L+2 (2%)   |
|              | 433.012 | 2.863 | 0.006 | H-4→L (96%)                                           |
|              | 424.793 | 2.919 | 0.000 | H-3→L (100%)                                          |
|              | 670.765 | 1.848 | 1.304 | H→L (99%)                                             |
|              | 511.106 | 2.426 | 0.353 | H-2→L (15%), H-1→L (78%), H→L+1 (3%)                  |
|              | 474.762 | 2.612 | 0.003 | H-2→L (82%), H-1→L (17%)                              |
| <b>PMDC4</b> | 445.874 | 2.781 | 0.658 | H→L+1 (85%), H-4→L (4%), H-1→L (2%)                   |
|              | 439.629 | 2.820 | 0.017 | H-4→L (93%), H→L+1 (4%)                               |
|              | 434.301 | 2.855 | 0.000 | H-3→L (100%)                                          |
|              | 672.840 | 1.843 | 1.335 | H→L (99%)                                             |
|              | 512.056 | 2.421 | 0.363 | H-2→L (17%), H-1→L (76%), H→L+1 (2%)                  |
|              | 475.965 | 2.605 | 0.003 | H-2→L (80%), H-1→L (19%)                              |
| <b>PMDC5</b> | 447.807 | 2.769 | 0.605 | H→L+1 (86%), H-5→L (2%), H-4→L (3%), H-1→L+1 (2%)     |
|              | 440.457 | 2.815 | 0.010 | H-4→L (94%), H→L+1 (3%)                               |
|              | 435.338 | 2.848 | 0.000 | H-3→L (100%)                                          |
|              | 663.905 | 1.868 | 1.491 | H→L (99%)                                             |
|              | 503.591 | 2.462 | 0.767 | H-2→L (72%), H-1→L (14%), H→L+1 (8%), H→L+3 (4%)      |
| <b>PMDC6</b> | 483.558 | 2.564 | 0.157 | H→L+1 (85%), H-2→L (6%), H-2→L+1 (3%), H-1→L (3%)     |
|              | 478.925 | 2.589 | 0.000 | H-2→L (18%), H-1→L (82%)                              |
|              | 439.193 | 2.823 | 0.063 | H-4→L (94%), H-3→L (3%)                               |
|              | 437.921 | 2.831 | 0.002 | H-3→L (97%), H-4→L (2%)                               |
|              | 553.205 | 2.241 | 1.891 | H→L (97%)                                             |
|              | 438.200 | 2.829 | 0.470 | H-1→L (61%), H→L+1 (36%)                              |
|              | 416.082 | 2.980 | 0.228 | H-1→L (37%), H→L+1 (60%)                              |
| <b>PMDC7</b> | 386.256 | 3.210 | 0.001 | H-2→L (94%), H-2→L+1 (4%)                             |
|              | 375.926 | 3.298 | 0.023 | H-4→L (92%), H-4→L+1 (3%)                             |
|              | 361.365 | 3.431 | 0.016 | H→L+2 (90%), H-6→L (2%), H-1→L+1 (3%)                 |
|              | 560.457 | 2.212 | 1.840 | H→L (98%)                                             |
|              | 443.355 | 2.797 | 0.493 | H-1→L (75%), H→L+1 (23%)                              |
| <b>PMDC8</b> | 427.487 | 2.900 | 0.000 | H-5→L (85%), H-5→L+1 (6%), H-5→L+2 (5%), H-5→L+4 (2%) |



|         |       |       |                           |
|---------|-------|-------|---------------------------|
| 410.966 | 3.017 | 0.303 | H-1→L (24%), H→L+1 (73%)  |
| 398.304 | 3.113 | 0.001 | H-2→L (96%), H-2→L+1 (3%) |
| 384.352 | 3.226 | 0.021 | H-4→L (94%), H-4→L+1 (2%) |

**Table S11:** Wave length  $\lambda$  (nm), excitation energy ( $E$ ) and oscillator strength ( $f$ ) of **PMD-1** and **PMDC2-PMDC8** in dichloromethane (DCM) at PBE1PBE functional

| Compounds    | $\lambda$ (nm) | $E$ (eV) | $f$   | MO contributions                                                         |
|--------------|----------------|----------|-------|--------------------------------------------------------------------------|
| <b>PMD-1</b> | 734.243        | 1.689    | 2.644 | H→L (95%), H-1→L+1 (4%)                                                  |
|              | 628.373        | 1.973    | 0.152 | H→L+1 (97%)                                                              |
|              | 533.679        | 2.323    | 0.104 | H-1→L (89%), H-2→L+1 (3%), H→L+3 (3%)                                    |
|              | 519.110        | 2.388    | 0.285 | H→L+2 (86%), H-1→L+3 (6%)                                                |
|              | 495.323        | 2.503    | 0.105 | H→L+3 (81%), H-1→L (3%), H-1→L+1 (4%), H-1→L+2 (5%)                      |
|              | 493.136        | 2.514    | 0.373 | H-2→L (13%), H-1→L+1 (71%), H-1→L (2%), H→L (3%), H→L+2 (3%), H→L+3 (3%) |
| <b>PMDC2</b> | 731.298        | 1.695    | 1.314 | H→L (96%), H-1→L (2%)                                                    |
|              | 536.868        | 2.309    | 0.093 | H-1→L (72%), H→L+1 (18%), H-3→L (3%), H-1→L+1 (2%)                       |
|              | 530.368        | 2.338    | 0.693 | H-1→L (18%), H→L+1 (73%), H-1→L+1 (4%)                                   |
|              | 465.336        | 2.664    | 0.021 | H-3→L (66%), H-2→L (28%), H-1→L (4%)                                     |
|              | 459.899        | 2.696    | 0.005 | H-3→L (28%), H-2→L (71%)                                                 |
|              | 425.361        | 2.915    | 0.655 | H→L+2 (94%)                                                              |
| <b>PMDC3</b> | 721.174        | 1.719    | 1.451 | H→L (97%), H-1→L (2%)                                                    |
|              | 529.372        | 2.342    | 0.285 | H-1→L (92%), H-3→L (3%), H→L (2%)                                        |
|              | 467.900        | 2.650    | 0.682 | H→L+1 (89%), H-1→L+1 (4%), H→L+2 (2%)                                    |
|              | 460.942        | 2.690    | 0.032 | H-3→L (75%), H-2→L (19%), H-1→L (4%)                                     |
|              | 454.771        | 2.726    | 0.006 | H-3→L (20%), H-2→L (79%)                                                 |
|              | 417.920        | 2.967    | 0.360 | H→L+2 (88%), H-5→L (2%), H-1→L+1 (3%)                                    |
| <b>PMDC4</b> | 733.461        | 1.690    | 1.436 | H→L (97%)                                                                |
|              | 536.496        | 2.311    | 0.299 | H-1→L (92%), H-3→L (3%), H→L (2%)                                        |
|              | 468.554        | 2.646    | 0.014 | H-3→L (71%), H-2→L (25%), H-1→L (3%)                                     |
|              | 466.861        | 2.656    | 0.713 | H→L+1 (89%), H-1→L+1 (3%), H→L+2 (2%)                                    |
|              | 463.042        | 2.678    | 0.018 | H-3→L (25%), H-2→L (74%)                                                 |
|              | 420.870        | 2.946    | 0.000 | H-4→L (100%)                                                             |
| <b>PMDC5</b> | 736.292        | 1.684    | 1.464 | H→L (97%)                                                                |
|              | 537.752        | 2.306    | 0.308 | H-1→L (92%), H-3→L (3%), H→L (2%)                                        |
|              | 472.465        | 2.624    | 0.600 | H→L+1 (89%), H-1→L+1 (5%), H→L+2 (2%)                                    |
|              | 469.797        | 2.639    | 0.027 | H-3→L (69%), H-2→L (26%), H-1→L (4%)                                     |
|              | 464.569        | 2.669    | 0.009 | H-3→L (26%), H-2→L (73%)                                                 |
|              | 422.117        | 2.937    | 0.000 | H-4→L (100%)                                                             |
| <b>PMDC6</b> | 739.542        | 1.677    | 1.568 | H→L (98%)                                                                |
|              | 538.243        | 2.304    | 0.695 | H-1→L (84%), H-3→L (2%), H→L+1 (9%)                                      |
|              | 523.162        | 2.370    | 0.198 | H-1→L (10%), H→L+1 (84%), H-1→L+1 (4%)                                   |
|              | 487.034        | 2.546    | 0.000 | H-1→L+2 (11%), H→L+2 (84%), H-5→L+2 (2%)                                 |
|              | 475.984        | 2.605    | 0.003 | H-2→L (96%), H-3→L (3%)                                                  |

|              |         |       |       |                                         |
|--------------|---------|-------|-------|-----------------------------------------|
|              | 473.168 | 2.620 | 0.067 | H-3→L (92%), H-2→L (3%), H-1→L (2%)     |
| <b>PMDC7</b> | 567.200 | 2.186 | 2.153 | H→L (96%)                               |
|              | 436.949 | 2.838 | 0.412 | H-1→L (32%), H→L+1 (63%), H→L (2%)      |
|              | 432.498 | 2.867 | 0.160 | H-1→L (64%), H→L+1 (32%)                |
|              | 374.597 | 3.310 | 0.040 | H-3→L (88%), H-3→L+1 (5%), H-2→L (4%)   |
|              | 370.777 | 3.344 | 0.026 | H-1→L+1 (14%), H→L+2 (82%)              |
|              | 362.697 | 3.418 | 0.001 | H-2→L (88%), H-3→L (4%), H-2→L+1 (6%)   |
| <b>PMDC8</b> | 600.902 | 2.063 | 1.930 | H→L (96%)                               |
|              | 457.743 | 2.709 | 0.400 | H-1→L (90%), H→L+1 (6%)                 |
|              | 428.537 | 2.893 | 0.550 | H→L+1 (90%), H-1→L (7%)                 |
|              | 400.673 | 3.094 | 0.039 | H-3→L (91%), H-3→L+1 (2%), H-2→L (4%)   |
|              | 400.104 | 3.099 | 0.000 | H-5→L (85%), H-5→L+1 (6%), H-5→L+2 (6%) |
|              | 390.920 | 3.172 | 0.001 | H-2→L (94%), H-3→L (4%)                 |

**Table S12:** Natural bond orbitals analysis for the reference compound (**PMD-1**) with its representative values

| <b>Donor(i)</b> | <b>Type</b> | <b>Acceptor(j)</b> | <b>Type</b> | <b><math>E(2)^a</math></b> | <b><math>E(J)E(i)^b</math></b> | <b><math>F(i,j)^c</math></b> |
|-----------------|-------------|--------------------|-------------|----------------------------|--------------------------------|------------------------------|
| C9-C10          | $\pi$       | C51-C61            | $\pi^*$     | 30.03                      | 0.31                           | 0.086                        |
| C85-N86         | $\pi$       | C83-N84            | $\pi^*$     | 0.64                       | 0.48                           | 0.016                        |
| C53-H54         | $\sigma$    | C78-C81            | $\sigma^*$  | 9.24                       | 1.03                           | 0.087                        |
| C51-C61         | $\sigma$    | C9-C10             | $\sigma^*$  | 0.50                       | 1.31                           | 0.023                        |
| O89             | LP(2)       | C1-C2              | $\pi^*$     | 32.44                      | 0.36                           | 0.102                        |
| O88             | LP(2)       | C78-C87            | $\sigma^*$  | 22.00                      | 0.72                           | 0.114                        |
| C9-C10          | $\pi$       | C11-C12            | $\pi^*$     | 18.94                      | 0.29                           | 0.068                        |
| C29-C30         | $\pi$       | C25-C26            | $\pi^*$     | 15.22                      | 0.31                           | 0.062                        |
| C16-C17         | $\pi$       | C3-C4              | $\pi^*$     | 12.73                      | 0.31                           | 0.060                        |
| C81-C82         | $\pi$       | C73-C74            | $\pi^*$     | 9.83                       | 0.33                           | 0.052                        |
| C66-C67         | $\pi$       | C51-C61            | $\pi^*$     | 8.10                       | 0.33                           | 0.047                        |
| C64-O65         | $\pi$       | C55-C60            | $\pi^*$     | 4.56                       | 0.43                           | 0.043                        |
| C64-O65         | $\pi$       | C51-C61            | $\pi^*$     | 3.94                       | 0.43                           | 0.040                        |
| C68-N69         | $\pi$       | C70-N71            | $\pi^*$     | 0.85                       | 0.47                           | 0.018                        |
| C83-N84         | $\pi$       | C85-N86            | $\pi^*$     | 0.66                       | 0.47                           | 0.016                        |
| C53-H54         | $\sigma$    | C27-S31            | $\sigma^*$  | 8.86                       | 0.73                           | 0.072                        |
| C15-C18         | $\sigma$    | C12-S21            | $\sigma^*$  | 8.39                       | 0.96                           | 0.080                        |
| C51-H52         | $\sigma$    | C9-C10             | $\sigma^*$  | 7.35                       | 1.10                           | 0.080                        |
| C27-C28         | $\sigma$    | C29-C33            | $\sigma^*$  | 7.17                       | 1.16                           | 0.082                        |
| C53-C78         | $\sigma$    | C78-C81            | $\sigma^*$  | 6.38                       | 1.26                           | 0.080                        |
| C67-C68         | $\sigma$    | C66-C67            | $\sigma^*$  | 6.14                       | 1.35                           | 0.081                        |
| C27-S31         | $\sigma$    | C26-C30            | $\sigma^*$  | 5.98                       | 1.21                           | 0.076                        |
| C10-H13         | $\sigma$    | C9-S21             | $\sigma^*$  | 5.78                       | 0.74                           | 0.058                        |
| C28-H32         | $\sigma$    | C27-S31            | $\sigma^*$  | 5.58                       | 0.75                           | 0.058                        |
| C78-C87         | $\sigma$    | C27-C53            | $\sigma^*$  | 5.33                       | 1.21                           | 0.072                        |
| C9-C51          | $\sigma$    | C9-C10             | $\sigma^*$  | 4.93                       | 1.32                           | 0.072                        |

|         |          |         |            |       |      |       |
|---------|----------|---------|------------|-------|------|-------|
| C27-C28 | $\sigma$ | C27-C53 | $\sigma^*$ | 4.72  | 1.29 | 0.070 |
| C55-C56 | $\sigma$ | C66-C67 | $\sigma^*$ | 3.79  | 1.31 | 0.063 |
| C15-C16 | $\sigma$ | C12-C18 | $\sigma^*$ | 3.41  | 1.24 | 0.058 |
| C72-C87 | $\sigma$ | C72-C73 | $\sigma^*$ | 2.69  | 1.24 | 0.051 |
| C11-C12 | $\sigma$ | C11-C14 | $\sigma^*$ | 2.42  | 1.14 | 0.047 |
| C28-C29 | $\sigma$ | C28-H32 | $\sigma^*$ | 1.83  | 1.18 | 0.042 |
| C59-C60 | $\sigma$ | C60-H63 | $\sigma^*$ | 1.14  | 1.2  | 0.033 |
| C55-C60 | $\sigma$ | C61-C64 | $\sigma^*$ | 0.94  | 1.2  | 0.03  |
| C93-C95 | $\sigma$ | C93-H94 | $\sigma^*$ | 0.63  | 1.07 | 0.023 |
| O90     | LP(2)    | C3-C4   | $\pi^*$    | 29.25 | 0.36 | 0.099 |
| S34     | LP(2)    | C25-C26 | $\pi^*$    | 24.75 | 0.29 | 0.076 |
| S21     | LP(2)    | C9-C10  | $\pi^*$    | 19.41 | 0.28 | 0.066 |
| O65     | LP(2)    | C55-C64 | $\sigma^*$ | 20.74 | 0.75 | 0.113 |
| N69     | LP(1)    | C67-C68 | $\sigma^*$ | 12.83 | 1.04 | 0.103 |
| O90     | LP(1)    | C4-C5   | $\sigma^*$ | 7.42  | 1.14 | 0.082 |
| O89     | LP(2)    | C93-C95 | $\sigma^*$ | 0.82  | 0.74 | 0.023 |
| O89     | LP(1)    | C95-H98 | $\sigma^*$ | 0.61  | 0.98 | 0.022 |

**Table S13:** Natural bond orbitals analysis for **PMDC2** with its representative values

| Donor(i) | Type     | Acceptor(j) | Type       | $E(2)^a$ | $E(J)E(i)^b$ | $F(i,j)^c$ |
|----------|----------|-------------|------------|----------|--------------|------------|
| C27-C28  | $\pi$    | C51-C59     | $\pi^*$    | 29.56    | 0.31         | 0.086      |
| C64-N65  | $\pi$    | C66-N67     | $\pi^*$    | 0.66     | 0.47         | 0.016      |
| C51-H52  | $\sigma$ | C59-C62     | $\sigma^*$ | 9.14     | 1.03         | 0.087      |
| C74-H75  | $\sigma$ | O70-C74     | $\sigma^*$ | 0.50     | 0.82         | 0.018      |
| N94      | LP(1)    | C108-C109   | $\pi^*$    | 35.62    | 0.31         | 0.097      |
| O69      | LP(2)    | C59-C68     | $\sigma^*$ | 21.87    | 0.73         | 0.114      |
| C1-C2    | $\pi$    | C5-C6       | $\pi^*$    | 18.74    | 0.30         | 0.070      |
| C25-C26  | $\pi$    | C22-C23     | $\pi^*$    | 16.85    | 0.31         | 0.066      |
| C15-C18  | $\pi$    | C11-C12     | $\pi^*$    | 15.39    | 0.31         | 0.064      |
| C22-C23  | $\pi$    | C5-C6       | $\pi^*$    | 13.69    | 0.31         | 0.062      |
| C51-C59  | $\pi$    | C27-C28     | $\pi^*$    | 11.96    | 0.29         | 0.055      |
| C62-C63  | $\pi$    | C54-C55     | $\pi^*$    | 9.83     | 0.33         | 0.052      |
| C62-C63  | $\pi$    | C51-C59     | $\pi^*$    | 8.82     | 0.34         | 0.050      |
| C68-O69  | $\pi$    | C53-C58     | $\pi^*$    | 4.38     | 0.42         | 0.042      |
| C68-O69  | $\pi$    | C51-C59     | $\pi^*$    | 2.78     | 0.43         | 0.033      |
| C51-H52  | $\sigma$ | C27-S31     | $\sigma^*$ | 8.99     | 0.73         | 0.072      |
| C66-N67  | $\sigma$ | C63-C66     | $\sigma^*$ | 8.22     | 1.60         | 0.103      |
| C27-C28  | $\sigma$ | C29-C33     | $\sigma^*$ | 7.21     | 1.16         | 0.082      |
| C16-C17  | $\sigma$ | C14-C15     | $\sigma^*$ | 6.63     | 1.17         | 0.079      |
| C59-C62  | $\sigma$ | C51-C59     | $\sigma^*$ | 6.24     | 1.31         | 0.081      |
| C27-S31  | $\sigma$ | C26-C30     | $\sigma^*$ | 5.96     | 1.22         | 0.076      |
| C4-C5    | $\sigma$ | C3-C4       | $\sigma^*$ | 5.72     | 1.29         | 0.077      |

|         |          |         |            |       |      |       |
|---------|----------|---------|------------|-------|------|-------|
| C23-C25 | $\sigma$ | C6-C22  | $\sigma^*$ | 5.07  | 1.22 | 0.070 |
| C2-H7   | $\sigma$ | C1-C6   | $\sigma^*$ | 4.79  | 1.09 | 0.065 |
| C59-C62 | $\sigma$ | C54-C55 | $\sigma^*$ | 4.24  | 1.27 | 0.066 |
| C23-C25 | $\sigma$ | C25-C26 | $\sigma^*$ | 3.95  | 1.28 | 0.064 |
| C80-H81 | $\sigma$ | C74-C76 | $\sigma^*$ | 3.35  | 0.92 | 0.050 |
| C5-C6   | $\sigma$ | C22-C23 | $\sigma^*$ | 3.16  | 1.29 | 0.057 |
| C59-C62 | $\sigma$ | C68-O69 | $\sigma^*$ | 2.94  | 1.32 | 0.056 |
| C63-C66 | $\sigma$ | C63-C64 | $\sigma^*$ | 2.70  | 1.27 | 0.052 |
| C59-C62 | $\sigma$ | C54-C62 | $\sigma^*$ | 2.21  | 1.16 | 0.045 |
| C4-O71  | $\sigma$ | C4-C5   | $\sigma^*$ | 1.55  | 1.52 | 0.043 |
| C51-C59 | $\sigma$ | C54-C62 | $\sigma^*$ | 1.29  | 1.21 | 0.035 |
| C11-C14 | $\sigma$ | C9-C10  | $\sigma^*$ | 0.95  | 1.22 | 0.031 |
| C22-S34 | $\sigma$ | C25-C33 | $\sigma^*$ | 0.50  | 1.11 | 0.021 |
| N94     | LP(1)    | C95-C96 | $\pi^*$    | 35.61 | 0.31 | 0.097 |
| O70     | LP(2)    | C1-C2   | $\pi^*$    | 32.08 | 0.36 | 0.102 |
| S21     | LP(2)    | C9-C10  | $\pi^*$    | 22.76 | 0.28 | 0.072 |
| O69     | LP(2)    | C53-C68 | $\sigma^*$ | 21.49 | 0.74 | 0.114 |
| N67     | LP(1)    | C63-C66 | $\sigma^*$ | 12.69 | 1.05 | 0.103 |
| O71     | LP(2)    | C72-C88 | $\sigma^*$ | 5.89  | 0.73 | 0.061 |
| O70     | LP(2)    | C80-H82 | $\sigma^*$ | 0.71  | 0.76 | 0.022 |

**Table S14:** Natural bond orbitals analysis for **PMDC3** with its representative values

| <b>Donor(i)</b> | <b>Type</b> | <b>Acceptor(j)</b> | <b>Type</b> | <b><math>E(2)^a</math></b> | <b><math>E(J)E(i)^b</math></b> | <b><math>F(i,j)^c</math></b> |
|-----------------|-------------|--------------------|-------------|----------------------------|--------------------------------|------------------------------|
| C27-C28         | $\pi$       | C51-C55            | $\pi^*$     | 29.15                      | 0.31                           | 0.086                        |
| C56-C57         | $\pi$       | C60-N61            | $\pi^*$     | 0.50                       | 0.41                           | 0.013                        |
| C51-H52         | $\sigma$    | C55-C56            | $\sigma^*$  | 9.16                       | 1.03                           | 0.087                        |
| C58-N59         | $\sigma$    | C56-C57            | $\sigma^*$  | 0.50                       | 1.66                           | 0.026                        |
| N86             | LP(1)       | C87-C88            | $\pi^*$     | 35.63                      | 0.31                           | 0.097                        |
| O63             | LP(2)       | C55-C62            | $\sigma^*$  | 22.28                      | 0.71                           | 0.114                        |
| C25-C26         | $\pi$       | C22-C23            | $\pi^*$     | 16.88                      | 0.31                           | 0.066                        |
| C29-C30         | $\pi$       | C25-C26            | $\pi^*$     | 15.21                      | 0.31                           | 0.062                        |
| C3-C4           | $\pi$       | C16-C17            | $\pi^*$     | 13.91                      | 0.29                           | 0.058                        |
| C51-C55         | $\pi$       | C27-C28            | $\pi^*$     | 12.1                       | 0.29                           | 0.055                        |
| C56-C57         | $\pi$       | C54-C108           | $\pi^*$     | 11.6                       | 0.32                           | 0.056                        |
| C56-C57         | $\pi$       | C51-C55            | $\pi^*$     | 8.66                       | 0.34                           | 0.049                        |
| C62-O63         | $\pi$       | C53-C107           | $\pi^*$     | 5.12                       | 0.42                           | 0.045                        |
| C62-O63         | $\pi$       | C51-C55            | $\pi^*$     | 2.64                       | 0.43                           | 0.032                        |
| C58-N59         | $\pi$       | C60-N61            | $\pi^*$     | 0.58                       | 0.47                           | 0.015                        |
| C51-H52         | $\sigma$    | C27-S31            | $\sigma^*$  | 9.01                       | 0.72                           | 0.072                        |
| C25-C26         | $\sigma$    | C30-S31            | $\sigma^*$  | 8.52                       | 0.96                           | 0.081                        |
| C60-N61         | $\sigma$    | C57-C60            | $\sigma^*$  | 8.13                       | 1.6                            | 0.103                        |
| C22-C23         | $\sigma$    | C25-C33            | $\sigma^*$  | 6.72                       | 1.17                           | 0.079                        |

|           |          |           |            |       |      |       |
|-----------|----------|-----------|------------|-------|------|-------|
| C9-S21    | $\sigma$ | C12-C18   | $\sigma^*$ | 6.17  | 1.2  | 0.077 |
| C27-S31   | $\sigma$ | C26-C30   | $\sigma^*$ | 5.97  | 1.21 | 0.076 |
| C55-C62   | $\sigma$ | C27-C51   | $\sigma^*$ | 5.43  | 1.21 | 0.073 |
| C87-C88   | $\sigma$ | C87-C92   | $\sigma^*$ | 5.09  | 1.28 | 0.072 |
| C102-H106 | $\sigma$ | C100-C101 | $\sigma^*$ | 4.94  | 1.09 | 0.066 |
| C9-C10    | $\sigma$ | C10-C11   | $\sigma^*$ | 4.55  | 1.32 | 0.069 |
| C12-S21   | $\sigma$ | C11-C14   | $\sigma^*$ | 3.65  | 1.15 | 0.058 |
| C12-C18   | $\sigma$ | C15-C16   | $\sigma^*$ | 3.33  | 1.3  | 0.059 |
| C55-C56   | $\sigma$ | C54-C56   | $\sigma^*$ | 2.48  | 1.18 | 0.048 |
| C22-C23   | $\sigma$ | C5-C6     | $\sigma^*$ | 2.31  | 1.31 | 0.049 |
| C55-C62   | $\sigma$ | C55-C56   | $\sigma^*$ | 1.79  | 1.15 | 0.041 |
| C4-C5     | $\sigma$ | C5-H8     | $\sigma^*$ | 1.7   | 1.19 | 0.04  |
| C51-C55   | $\sigma$ | C54-C56   | $\sigma^*$ | 1.29  | 1.23 | 0.036 |
| C51-H52   | $\sigma$ | C27-C51   | $\sigma^*$ | 0.9   | 1.08 | 0.028 |
| C70-H72   | $\sigma$ | O64-C68   | $\sigma^*$ | 0.63  | 0.81 | 0.02  |
| O64       | LP(2)    | C1-C2     | $\pi^*$    | 32.03 | 0.36 | 0.102 |
| S34       | LP(2)    | C25-C26   | $\pi^*$    | 24.42 | 0.29 | 0.075 |
| S31       | LP(2)    | C27-C28   | $\pi^*$    | 21.16 | 0.27 | 0.068 |
| O63       | LP(2)    | C53-C62   | $\sigma^*$ | 21.84 | 0.74 | 0.115 |
| N86       | LP(1)    | C9-S21    | $\sigma^*$ | 14.65 | 0.48 | 0.081 |
| O64       | LP(2)    | C68-C74   | $\sigma^*$ | 5.83  | 0.73 | 0.06  |
| O65       | LP(1)    | C66-H67   | $\sigma^*$ | 1.86  | 0.98 | 0.038 |

**Table S15:** Natural bond orbitals analysis for **PMDC4** with its representative values

| Donor(i) | Type     | Acceptor(j) | Type       | $E(2)^a$ | $E(J)E(i)^b$ | $F(i,j)^c$ |
|----------|----------|-------------|------------|----------|--------------|------------|
| C27-C28  | $\pi$    | C51-C55     | $\pi^*$    | 29.86    | 0.31         | 0.087      |
| C60-N61  | $\pi$    | C58-N59     | $\pi^*$    | 0.55     | 0.48         | 0.014      |
| C51-H52  | $\sigma$ | C55-C56     | $\sigma^*$ | 9.09     | 1.03         | 0.087      |
| C22-S34  | $\sigma$ | C25-C33     | $\sigma^*$ | 0.50     | 1.11         | 0.021      |
| N86      | LP(1)    | C100-C101   | $\pi^*$    | 35.62    | 0.31         | 0.097      |
| O63      | LP(2)    | C55-C62     | $\sigma^*$ | 22.02    | 0.71         | 0.113      |
| C15-C18  | $\pi$    | C16-C17     | $\pi^*$    | 18.14    | 0.31         | 0.069      |
| C25-C26  | $\pi$    | C22-C23     | $\pi^*$    | 16.84    | 0.31         | 0.066      |
| C29-C30  | $\pi$    | C25-C26     | $\pi^*$    | 15.25    | 0.31         | 0.062      |
| C3-C4    | $\pi$    | C16-C17     | $\pi^*$    | 13.88    | 0.29         | 0.058      |
| C51-C55  | $\pi$    | C27-C28     | $\pi^*$    | 12.19    | 0.29         | 0.055      |
| C56-C57  | $\pi$    | C51-C55     | $\pi^*$    | 8.78     | 0.33         | 0.049      |
| C62-O63  | $\pi$    | C53-C107    | $\pi^*$    | 5.07     | 0.41         | 0.044      |
| C62-O63  | $\pi$    | C51-C55     | $\pi^*$    | 2.60     | 0.43         | 0.032      |
| C58-N59  | $\pi$    | C60-N61     | $\pi^*$    | 0.58     | 0.47         | 0.015      |
| C51-H52  | $\sigma$ | C27-S31     | $\sigma^*$ | 9.08     | 0.72         | 0.072      |
| C57-C60  | $\sigma$ | C60-N61     | $\sigma^*$ | 8.46     | 1.67         | 0.107      |

|         |          |         |            |       |      |       |
|---------|----------|---------|------------|-------|------|-------|
| C60-N61 | $\sigma$ | C57-C60 | $\sigma^*$ | 8.15  | 1.60 | 0.103 |
| C27-C28 | $\sigma$ | C29-C33 | $\sigma^*$ | 7.24  | 1.16 | 0.082 |
| C9-C10  | $\sigma$ | C11-C14 | $\sigma^*$ | 6.64  | 1.19 | 0.079 |
| C9-S21  | $\sigma$ | C12-C18 | $\sigma^*$ | 6.17  | 1.20 | 0.077 |
| C56-C57 | $\sigma$ | C57-C60 | $\sigma^*$ | 5.66  | 1.28 | 0.076 |
| C51-C55 | $\sigma$ | C27-C51 | $\sigma^*$ | 5.36  | 1.32 | 0.075 |
| C15-C16 | $\sigma$ | C3-C17  | $\sigma^*$ | 5.24  | 1.21 | 0.071 |
| C55-C56 | $\sigma$ | C56-C57 | $\sigma^*$ | 4.59  | 1.28 | 0.068 |
| C2-C3   | $\sigma$ | C3-C17  | $\sigma^*$ | 4.35  | 1.23 | 0.065 |
| C10-C11 | $\sigma$ | C11-C14 | $\sigma^*$ | 3.91  | 1.14 | 0.060 |
| C1-C2   | $\sigma$ | C6-C22  | $\sigma^*$ | 3.87  | 1.24 | 0.062 |
| C28-C29 | $\sigma$ | C27-C28 | $\sigma^*$ | 3.46  | 1.28 | 0.059 |
| C10-H13 | $\sigma$ | C11-C12 | $\sigma^*$ | 2.78  | 1.13 | 0.050 |
| C3-C17  | $\sigma$ | C15-C16 | $\sigma^*$ | 1.85  | 1.29 | 0.044 |
| C2-C3   | $\sigma$ | C2-H7   | $\sigma^*$ | 1.63  | 1.17 | 0.039 |
| C18-S20 | $\sigma$ | C11-C12 | $\sigma^*$ | 0.94  | 1.30 | 0.031 |
| C68-H69 | $\sigma$ | O64-C68 | $\sigma^*$ | 0.50  | 0.82 | 0.018 |
| N86     | LP(1)    | C87-C88 | $\pi^*$    | 35.61 | 0.31 | 0.097 |
| O64     | LP(2)    | C1-C2   | $\pi^*$    | 32.1  | 0.36 | 0.102 |
| S31     | LP(2)    | C27-C28 | $\pi^*$    | 21.03 | 0.27 | 0.068 |
| O63     | LP(2)    | C53-C62 | $\sigma^*$ | 23.04 | 0.73 | 0.118 |
| N61     | LP(1)    | C57-C60 | $\sigma^*$ | 12.61 | 1.05 | 0.103 |
| N86     | LP(1)    | C9-C10  | $\sigma^*$ | 6.62  | 0.87 | 0.074 |
| O65     | LP(1)    | C78-H81 | $\sigma^*$ | 0.62  | 0.98 | 0.022 |

**Table S16:** Natural bond orbitals analysis for **PMDC5** with its representative values

| <b>Donor(i)</b> | <b>Type</b> | <b>Acceptor(j)</b> | <b>Type</b> | <b><math>E(2)^a</math></b> | <b><math>E(J)E(i)^b</math></b> | <b><math>F(i,j)^c</math></b> |
|-----------------|-------------|--------------------|-------------|----------------------------|--------------------------------|------------------------------|
| C27-C28         | $\pi$       | C51-C55            | $\pi^*$     | 29.88                      | 0.31                           | 0.087                        |
| C60-N61         | $\pi$       | C58-N59            | $\pi^*$     | 0.55                       | 0.48                           | 0.014                        |
| C51-H52         | $\sigma$    | C55-C56            | $\sigma^*$  | 9.09                       | 1.03                           | 0.087                        |
| C68-H69         | $\sigma$    | O64-C68            | $\sigma^*$  | 0.50                       | 0.82                           | 0.018                        |
| N86             | LP(1)       | C100-C101          | $\pi^*$     | 35.62                      | 0.31                           | 0.097                        |
| O63             | LP(2)       | C53-C62            | $\sigma^*$  | 22.84                      | 0.73                           | 0.117                        |
| C27-C28         | $\pi$       | C29-C30            | $\pi^*$     | 18.55                      | 0.30                           | 0.068                        |
| C25-C26         | $\pi$       | C22-C23            | $\pi^*$     | 16.83                      | 0.31                           | 0.066                        |
| C9-C10          | $\pi$       | C11-C12            | $\pi^*$     | 15.49                      | 0.33                           | 0.068                        |
| C54-C108        | $\pi$       | C56-C57            | $\pi^*$     | 14.35                      | 0.32                           | 0.063                        |
| C51-C55         | $\pi$       | C27-C28            | $\pi^*$     | 12.18                      | 0.29                           | 0.055                        |
| C56-C57         | $\pi$       | C51-C55            | $\pi^*$     | 8.76                       | 0.33                           | 0.049                        |
| C62-O63         | $\pi$       | C53-C107           | $\pi^*$     | 5.46                       | 0.40                           | 0.046                        |
| C62-O63         | $\pi$       | C51-C55            | $\pi^*$     | 2.62                       | 0.43                           | 0.032                        |
| C56-C57         | $\pi$       | C60-N61            | $\pi^*$     | 0.55                       | 0.40                           | 0.014                        |

|         |          |          |            |       |      |       |
|---------|----------|----------|------------|-------|------|-------|
| C51-H52 | $\sigma$ | C27-S31  | $\sigma^*$ | 9.07  | 0.72 | 0.072 |
| C29-C30 | $\sigma$ | C26-S34  | $\sigma^*$ | 8.53  | 0.95 | 0.081 |
| C11-C12 | $\sigma$ | C18-S20  | $\sigma^*$ | 8.25  | 0.96 | 0.080 |
| C27-C28 | $\sigma$ | C29-C33  | $\sigma^*$ | 7.24  | 1.16 | 0.082 |
| C22-C23 | $\sigma$ | C25-C33  | $\sigma^*$ | 6.72  | 1.17 | 0.079 |
| C51-C55 | $\sigma$ | C55-C56  | $\sigma^*$ | 6.11  | 1.26 | 0.079 |
| C27-S31 | $\sigma$ | C26-C30  | $\sigma^*$ | 5.98  | 1.22 | 0.076 |
| C57-C60 | $\sigma$ | C56-C57  | $\sigma^*$ | 5.59  | 1.34 | 0.077 |
| C1-C6   | $\sigma$ | C6-C22   | $\sigma^*$ | 5.08  | 1.22 | 0.070 |
| C3-C4   | $\sigma$ | C3-C17   | $\sigma^*$ | 4.92  | 1.22 | 0.069 |
| C22-C23 | $\sigma$ | C23-C25  | $\sigma^*$ | 4.54  | 1.32 | 0.069 |
| C3-C4   | $\sigma$ | C2-C3    | $\sigma^*$ | 4.08  | 1.29 | 0.065 |
| C1-C2   | $\sigma$ | C6-C22   | $\sigma^*$ | 3.87  | 1.24 | 0.062 |
| C12-C18 | $\sigma$ | C15-C16  | $\sigma^*$ | 3.33  | 1.30 | 0.059 |
| C53-C62 | $\sigma$ | C51-C55  | $\sigma^*$ | 2.69  | 1.29 | 0.053 |
| C55-C56 | $\sigma$ | C54-C56  | $\sigma^*$ | 2.48  | 1.18 | 0.048 |
| C33-C39 | $\sigma$ | C29-C33  | $\sigma^*$ | 1.82  | 1.05 | 0.039 |
| C12-S21 | $\sigma$ | C11-C12  | $\sigma^*$ | 1.24  | 1.30 | 0.036 |
| C5-H8   | $\sigma$ | C4-C5    | $\sigma^*$ | 1.18  | 1.13 | 0.033 |
| C62-O63 | $\sigma$ | C53-C54  | $\sigma^*$ | 0.50  | 1.64 | 0.026 |
| N86     | LP(1)    | C87-C88  | $\pi^*$    | 35.61 | 0.31 | 0.097 |
| S34     | LP(2)    | C22-C23  | $\pi^*$    | 23.82 | 0.28 | 0.073 |
| S31     | LP(2)    | C27-C28  | $\pi^*$    | 21.03 | 0.27 | 0.068 |
| N61     | LP(1)    | C57-C60  | $\sigma^*$ | 12.62 | 1.05 | 0.103 |
| O64     | LP(1)    | C1-C2    | $\sigma^*$ | 7.35  | 1.14 | 0.082 |
| Cl111   | LP(1)    | C53-C107 | $\sigma^*$ | 3.62  | 1.55 | 0.067 |
| O64     | LP(1)    | C68-H69  | $\sigma^*$ | 1.83  | 0.98 | 0.038 |

**Table S17:** Natural bond orbitals analysis for **PMDC6** with its representative values

| <b>Donor(i)</b> | <b>Type</b> | <b>Acceptor(j)</b> | <b>Type</b> | <b><math>E(2)^a</math></b> | <b><math>E(J)E(i)^b</math></b> | <b><math>F(i,j)^c</math></b> |
|-----------------|-------------|--------------------|-------------|----------------------------|--------------------------------|------------------------------|
| C27-C28         | $\pi$       | C51-C55            | $\pi^*$     | 34.98                      | 0.31                           | 0.093                        |
| C56-O105        | $\pi$       | C51-C55            | $\pi^*$     | 3.58                       | 0.43                           | 0.038                        |
| C51-H52         | $\sigma$    | C27-S31            | $\sigma^*$  | 11.12                      | 0.72                           | 0.080                        |
| C22-S34         | $\sigma$    | C25-C33            | $\sigma^*$  | 0.50                       | 1.11                           | 0.021                        |
| N80             | LP(1)       | C81-C86            | $\pi^*$     | 40.4                       | 0.31                           | 0.102                        |
| O105            | LP(2)       | C54-C56            | $\sigma^*$  | 22.61                      | 0.75                           | 0.118                        |
| C5-C6           | $\pi$       | C1-C2              | $\pi^*$     | 20.27                      | 0.30                           | 0.070                        |
| C91-C92         | $\pi$       | C95-C96            | $\pi^*$     | 19.91                      | 0.29                           | 0.069                        |
| C16-C17         | $\pi$       | C15-C18            | $\pi^*$     | 18.22                      | 0.31                           | 0.071                        |
| C25-C26         | $\pi$       | C22-C23            | $\pi^*$     | 16.76                      | 0.31                           | 0.065                        |
| C29-C30         | $\pi$       | C25-C26            | $\pi^*$     | 15.43                      | 0.30                           | 0.062                        |
| C22-C23         | $\pi$       | C5-C6              | $\pi^*$     | 13.57                      | 0.31                           | 0.061                        |

|           |          |           |            |       |      |       |
|-----------|----------|-----------|------------|-------|------|-------|
| C51-C55   | $\pi$    | C27-C28   | $\pi^*$    | 12.05 | 0.29 | 0.054 |
| C56-O105  | $\pi$    | C54-C102  | $\pi^*$    | 5.66  | 0.40 | 0.047 |
| N106-O109 | $\pi$    | C57-C104  | $\pi^*$    | 4.98  | 0.49 | 0.048 |
| C51-H52   | $\sigma$ | C55-C56   | $\sigma^*$ | 6.97  | 0.98 | 0.074 |
| C10-C11   | $\sigma$ | C9-N80    | $\sigma^*$ | 6.38  | 1.15 | 0.077 |
| C22-S34   | $\sigma$ | C26-C30   | $\sigma^*$ | 5.92  | 1.21 | 0.076 |
| C95-C96   | $\sigma$ | C94-C95   | $\sigma^*$ | 5.53  | 1.29 | 0.075 |
| C29-C33   | $\sigma$ | C23-C25   | $\sigma^*$ | 5.27  | 1.21 | 0.072 |
| C6-C22    | $\sigma$ | C5-C6     | $\sigma^*$ | 4.71  | 1.29 | 0.070 |
| C29-C33   | $\sigma$ | C28-C29   | $\sigma^*$ | 4.57  | 1.24 | 0.067 |
| C3-C17    | $\sigma$ | C16-C17   | $\sigma^*$ | 4.49  | 1.30 | 0.068 |
| C23-C25   | $\sigma$ | C25-C26   | $\sigma^*$ | 3.93  | 1.28 | 0.063 |
| C3-C4     | $\sigma$ | O59-C60   | $\sigma^*$ | 3.63  | 1.01 | 0.054 |
| C14-C15   | $\sigma$ | C15-C18   | $\sigma^*$ | 3.43  | 1.21 | 0.058 |
| C26-C30   | $\sigma$ | C23-C25   | $\sigma^*$ | 3.14  | 1.32 | 0.057 |
| C81-C82   | $\sigma$ | C82-C94   | $\sigma^*$ | 2.93  | 1.22 | 0.054 |
| C81-C82   | $\sigma$ | C83-H87   | $\sigma^*$ | 2.64  | 1.15 | 0.049 |
| C81-C86   | $\sigma$ | N80-C95   | $\sigma^*$ | 2.26  | 1.18 | 0.046 |
| C27-C51   | $\sigma$ | C28-C29   | $\sigma^*$ | 1.77  | 1.36 | 0.044 |
| C82-C94   | $\sigma$ | C83-C84   | $\sigma^*$ | 1.47  | 1.27 | 0.039 |
| C33-C35   | $\sigma$ | C29-C30   | $\sigma^*$ | 1.03  | 1.17 | 0.031 |
| C18-S20   | $\sigma$ | C11-C12   | $\sigma^*$ | 0.94  | 1.30 | 0.031 |
| C86-H90   | $\sigma$ | N80-C81   | $\sigma^*$ | 0.51  | 0.98 | 0.020 |
| N80       | LP(1)    | C95-C96   | $\pi^*$    | 40.37 | 0.31 | 0.102 |
| O58       | LP(2)    | C1-C2     | $\pi^*$    | 32.22 | 0.36 | 0.102 |
| C1112     | LP(3)    | C54-C102  | $\pi^*$    | 17.16 | 0.35 | 0.075 |
| O105      | LP(2)    | C55-C56   | $\sigma^*$ | 18.11 | 0.75 | 0.105 |
| O108      | LP(2)    | C104-N106 | $\sigma^*$ | 12.93 | 0.64 | 0.081 |
| N80       | LP(1)    | C9-C10    | $\sigma^*$ | 6.63  | 0.87 | 0.074 |
| O59       | LP(2)    | C60-H61   | $\sigma^*$ | 2.95  | 0.76 | 0.043 |

**Table S18:** Natural bond orbitals analysis for **PMDC7** with its representative values

| Donor(i)  | Type     | Acceptor(j) | Type       | $E(2)^a$ | $E(J)E(i)^b$ | $F(i,j)^c$ |
|-----------|----------|-------------|------------|----------|--------------|------------|
| C27-C28   | $\pi$    | C51-C56     | $\pi^*$    | 24.95    | 0.31         | 0.079      |
| C102-N103 | $\pi$    | C53-C54     | $\pi^*$    | 1.42     | 0.34         | 0.022      |
| C51-H52   | $\sigma$ | C56-S101    | $\sigma^*$ | 10.3     | 0.73         | 0.078      |
| C86-H90   | $\sigma$ | N80-C81     | $\sigma^*$ | 0.51     | 0.98         | 0.020      |
| N106      | LP(1)    | C53-C54     | $\pi^*$    | 70.27    | 0.27         | 0.125      |
| N80       | LP(1)    | C9-S21      | $\sigma^*$ | 14.62    | 0.48         | 0.081      |
| C15-C18   | $\pi$    | C16-C17     | $\pi^*$    | 17.76    | 0.31         | 0.069      |
| C25-C26   | $\pi$    | C29-C30     | $\pi^*$    | 16.50    | 0.31         | 0.066      |
| C29-C30   | $\pi$    | C25-C26     | $\pi^*$    | 15.17    | 0.31         | 0.064      |



|           |          |           |            |       |      |       |
|-----------|----------|-----------|------------|-------|------|-------|
| C16-C17   | $\pi$    | C2-C3     | $\pi^*$    | 14.01 | 0.31 | 0.063 |
| C22-C23   | $\pi$    | C1-C6     | $\pi^*$    | 12.72 | 0.31 | 0.060 |
| C109-C110 | $\pi$    | C51-C56   | $\pi^*$    | 10.73 | 0.33 | 0.056 |
| C53-C54   | $\pi$    | C102-N103 | $\pi^*$    | 5.00  | 0.42 | 0.043 |
| C110-H111 | $\sigma$ | N106-C109 | $\sigma^*$ | 9.75  | 0.94 | 0.086 |
| C25-C26   | $\sigma$ | C30-S31   | $\sigma^*$ | 8.65  | 0.95 | 0.081 |
| C102-N103 | $\sigma$ | C54-C102  | $\sigma^*$ | 8.12  | 1.60 | 0.103 |
| C110-H112 | $\sigma$ | C56-C109  | $\sigma^*$ | 7.96  | 1.01 | 0.081 |
| C27-C28   | $\sigma$ | C29-C33   | $\sigma^*$ | 6.94  | 1.17 | 0.081 |
| C16-C17   | $\sigma$ | C14-C15   | $\sigma^*$ | 6.63  | 1.17 | 0.079 |
| C51-C56   | $\sigma$ | C27-C51   | $\sigma^*$ | 6.29  | 1.33 | 0.082 |
| C23-H24   | $\sigma$ | C22-S34   | $\sigma^*$ | 5.96  | 0.75 | 0.06  |
| C25-C26   | $\sigma$ | C26-C30   | $\sigma^*$ | 5.65  | 1.24 | 0.075 |
| C25-C33   | $\sigma$ | C28-C29   | $\sigma^*$ | 5.24  | 1.21 | 0.071 |
| C6-C22    | $\sigma$ | C5-C6     | $\sigma^*$ | 4.71  | 1.28 | 0.070 |
| C94-C95   | $\sigma$ | C93-C94   | $\sigma^*$ | 4.16  | 1.28 | 0.065 |
| C6-C22    | $\sigma$ | C1-C6     | $\sigma^*$ | 3.97  | 1.26 | 0.063 |
| N80-C95   | $\sigma$ | C9-N80    | $\sigma^*$ | 3.73  | 1.25 | 0.061 |
| C92-C93   | $\sigma$ | C91-C92   | $\sigma^*$ | 3.07  | 1.30 | 0.057 |
| C82-C94   | $\sigma$ | C81-C82   | $\sigma^*$ | 2.85  | 1.23 | 0.053 |
| N80-C95   | $\sigma$ | N80-C81   | $\sigma^*$ | 2.45  | 1.25 | 0.050 |
| C33-C39   | $\sigma$ | C25-C33   | $\sigma^*$ | 1.83  | 1.05 | 0.039 |
| C27-C51   | $\sigma$ | C51-H52   | $\sigma^*$ | 1.02  | 1.17 | 0.031 |
| C76-H79   | $\sigma$ | O59-C60   | $\sigma^*$ | 0.51  | 0.81 | 0.018 |
| N80       | LP(1)    | C81-C82   | $\pi^*$    | 35.73 | 0.31 | 0.097 |
| O59       | LP(2)    | C4-C5     | $\pi^*$    | 31.56 | 0.36 | 0.101 |
| O58       | LP(2)    | C1-C6     | $\pi^*$    | 28.33 | 0.36 | 0.098 |
| S101      | LP(2)    | C51-C56   | $\pi^*$    | 21.40 | 0.30 | 0.072 |
| N105      | LP(1)    | C54-C104  | $\sigma^*$ | 12.93 | 1.05 | 0.104 |
| O58       | LP(1)    | C1-C2     | $\sigma^*$ | 7.29  | 1.14 | 0.082 |
| N106      | LP(1)    | C55-H57   | $\sigma^*$ | 4.31  | 0.69 | 0.055 |

**Table S19:** Natural bond orbitals analysis **PMDC8** with its representative values

| Donor(i)  | Type     | Acceptor(j) | Type       | $E(2)^a$ | $E(J)E(i)^b$ | $F(i,j)^c$ |
|-----------|----------|-------------|------------|----------|--------------|------------|
| C27-C28   | $\pi$    | C51-C55     | $\pi^*$    | 28.5     | 0.31         | 0.084      |
| C104-O106 | $\pi$    | C51-C55     | $\pi^*$    | 3.14     | 0.43         | 0.035      |
| C51-H52   | $\sigma$ | C55-S100    | $\sigma^*$ | 10.86    | 0.73         | 0.080      |
| C95-H99   | $\sigma$ | N79-C94     | $\sigma^*$ | 0.51     | 0.98         | 0.020      |
| N101      | LP(1)    | C53-S105    | $\pi^*$    | 84.27    | 0.20         | 0.118      |
| O106      | LP(2)    | N101-C104   | $\sigma^*$ | 29.74    | 0.69         | 0.130      |
| C2-C3     | $\pi$    | C4-C5       | $\pi^*$    | 19.53    | 0.30         | 0.069      |
| C16-C17   | $\pi$    | C15-C18     | $\pi^*$    | 18.32    | 0.31         | 0.071      |

|         |          |           |            |       |      |       |
|---------|----------|-----------|------------|-------|------|-------|
| C25-C26 | $\pi$    | C29-C30   | $\pi^*$    | 17.37 | 0.30 | 0.067 |
| C15-C18 | $\pi$    | C11-C12   | $\pi^*$    | 15.45 | 0.31 | 0.064 |
| C29-C30 | $\pi$    | C25-C26   | $\pi^*$    | 14.96 | 0.31 | 0.063 |
| C2-C3   | $\pi$    | C16-C17   | $\pi^*$    | 14.71 | 0.3  | 0.060 |
| C22-C23 | $\pi$    | C1-C6     | $\pi^*$    | 12.47 | 0.31 | 0.059 |
| C51-C55 | $\pi$    | C27-C28   | $\pi^*$    | 11.48 | 0.32 | 0.057 |
| C25-C26 | $\sigma$ | C30-S31   | $\sigma^*$ | 8.58  | 0.95 | 0.081 |
| C15-C18 | $\sigma$ | C12-S21   | $\sigma^*$ | 8.19  | 0.95 | 0.079 |
| C27-C28 | $\sigma$ | C29-C33   | $\sigma^*$ | 7.01  | 1.17 | 0.081 |
| C9-C10  | $\sigma$ | C11-C14   | $\sigma^*$ | 6.64  | 1.19 | 0.079 |
| C9-S21  | $\sigma$ | C12-C18   | $\sigma^*$ | 6.16  | 1.20 | 0.077 |
| C51-C55 | $\sigma$ | C27-C51   | $\sigma^*$ | 5.82  | 1.33 | 0.079 |
| C94-C95 | $\sigma$ | C93-C94   | $\sigma^*$ | 5.52  | 1.29 | 0.075 |
| C29-C33 | $\sigma$ | C23-C25   | $\sigma^*$ | 5.16  | 1.21 | 0.071 |
| C3-C4   | $\sigma$ | C3-C17    | $\sigma^*$ | 4.96  | 1.22 | 0.070 |
| C26-C30 | $\sigma$ | C25-C26   | $\sigma^*$ | 4.68  | 1.31 | 0.070 |
| C1-C6   | $\sigma$ | C5-C6     | $\sigma^*$ | 4.22  | 1.29 | 0.066 |
| C6-C22  | $\sigma$ | C1-C6     | $\sigma^*$ | 3.97  | 1.26 | 0.063 |
| C5-C6   | $\sigma$ | C1-O57    | $\sigma^*$ | 3.88  | 1.10 | 0.058 |
| C80-C85 | $\sigma$ | C84-C85   | $\sigma^*$ | 3.52  | 1.33 | 0.061 |
| C93-C94 | $\sigma$ | C81-C93   | $\sigma^*$ | 2.94  | 1.22 | 0.054 |
| C6-C22  | $\sigma$ | C1-C2     | $\sigma^*$ | 2.16  | 1.30 | 0.047 |
| C14-C43 | $\sigma$ | C14-C15   | $\sigma^*$ | 1.84  | 1.05 | 0.039 |
| C5-C6   | $\sigma$ | C5-H8     | $\sigma^*$ | 1.59  | 1.17 | 0.039 |
| C29-C33 | $\sigma$ | C33-C39   | $\sigma^*$ | 1.49  | 1.02 | 0.035 |
| C61-C63 | $\sigma$ | C63-H65   | $\sigma^*$ | 0.53  | 1.06 | 0.021 |
| N101    | LP(1)    | C104-O106 | $\pi^*$    | 51.3  | 0.30 | 0.113 |
| O57     | LP(2)    | C1-C6     | $\pi^*$    | 28.63 | 0.36 | 0.098 |
| S20     | LP(2)    | C16-C17   | $\pi^*$    | 22.43 | 0.29 | 0.072 |
| O106    | LP(2)    | C55-C104  | $\sigma^*$ | 20.08 | 0.73 | 0.110 |
| S105    | LP(2)    | C53-S100  | $\sigma^*$ | 15.46 | 0.41 | 0.072 |
| O58     | LP(2)    | C59-C75   | $\sigma^*$ | 5.93  | 0.73 | 0.061 |
| N101    | LP(1)    | C54-H103  | $\sigma^*$ | 4.43  | 0.7  | 0.056 |

**Table S20:** Dipole moment and major contributing tensors ( $D$ ) of the studied Compounds **PMD-1** and **PMDC2-PMDC8**

| Compounds    | $\mu_{xx}$ | $\mu_{yy}$ | $\mu_{zz}$ | $\mu_{total}$ |
|--------------|------------|------------|------------|---------------|
| <b>PMD-1</b> | 4.589      | -0.311     | -10.504    | 11.467        |
| <b>PMDC2</b> | -7.747     | 3.903      | -7.488     | 11.459        |
| <b>PMDC3</b> | -5.667     | 2.371      | -7.894     | 10.002        |
| <b>PMDC4</b> | -7.582     | 1.976      | -7.199     | 10.640        |
| <b>PMDC5</b> | -7.691     | 2.083      | -7.255     | 10.776        |

|              |         |        |       |        |
|--------------|---------|--------|-------|--------|
| <b>PMDC6</b> | -12.081 | 1.166  | 1.769 | 12.265 |
| <b>PMDC7</b> | -0.660  | 11.401 | 2.757 | 11.748 |
| <b>PMDC8</b> | 5.255   | 4.799  | 3.050 | 7.742  |

**Table S21:** Linear polarizability and its major contributing tensors ( $esu \times 10^{-22}$ ) of **PMD-1** and **MDC2-MDC8**.

| <b>Compounds</b> | $\alpha_{xx}$ | $\alpha_{yy}$ | $\alpha_{zz}$ | $\langle \alpha \rangle$ |
|------------------|---------------|---------------|---------------|--------------------------|
| <b>PMD-1</b>     | 5.723         | 1.838         | 1.020         | 2.860                    |
| <b>PMDC2</b>     | 4.076         | 1.634         | 1.165         | 2.292                    |
| <b>PMDC3</b>     | 4.053         | 1.653         | 1.145         | 2.284                    |
| <b>PMDC4</b>     | 4.117         | 1.651         | 1.148         | 2.306                    |
| <b>PMDC5</b>     | 4.223         | 1.655         | 1.173         | 2.350                    |
| <b>PMDC6</b>     | 4.638         | 1.691         | 1.024         | 2.451                    |
| <b>PMDC7</b>     | 3.449         | 1.612         | 1.005         | 2.022                    |
| <b>PMDC8</b>     | 3.481         | 1.569         | 9.876         | 2.012                    |

**Table S22:** The calculated first hyperpolarizability ( $\beta$ ) along its major contributing tensors ( $esu$ ) of **PMD-1** and **PMDC2-PMDC8**.

| <b>Systems</b> | <b>PMD-1</b>             | <b>PMDC2</b>             | <b>PMDC3</b>             | <b>PMDC4</b>             | <b>PMDC5</b>             | <b>PMDC6</b>             | <b>PMDC7</b>             | <b>PMDC8</b>             |
|----------------|--------------------------|--------------------------|--------------------------|--------------------------|--------------------------|--------------------------|--------------------------|--------------------------|
| $\beta_{xxx}$  | $6.622 \times 10^{-28}$  | $-3.122 \times 10^{-27}$ | $-3.120 \times 10^{-27}$ | $-3.370 \times 10^{-27}$ | $-3.519 \times 10^{-27}$ | $-4.452 \times 10^{-27}$ | $7.720 \times 10^{-28}$  | $1.450 \times 10^{-27}$  |
| $\beta_{xxy}$  | $2.021 \times 10^{-28}$  | $6.935 \times 10^{-29}$  | $1.895 \times 10^{-28}$  | $1.641 \times 10^{-28}$  | $1.608 \times 10^{-28}$  | $4.292 \times 10^{-29}$  | $8.557 \times 10^{-29}$  | $1.420 \times 10^{-28}$  |
| $\beta_{xyy}$  | $-5.306 \times 10^{-29}$ | $-4.662 \times 10^{-29}$ | $-6.916 \times 10^{-29}$ | $-6.547 \times 10^{-29}$ | $-6.654 \times 10^{-29}$ | $-1.260 \times 10^{-29}$ | $-8.374 \times 10^{-31}$ | $1.725 \times 10^{-29}$  |
| $\beta_{yyy}$  | $1.277 \times 10^{-29}$  | $1.300 \times 10^{-29}$  | $3.010 \times 10^{-29}$  | $2.885 \times 10^{-29}$  | $2.881 \times 10^{-29}$  | $1.583 \times 10^{-29}$  | $-3.417 \times 10^{-29}$ | $-1.694 \times 10^{-29}$ |
| $\beta_{xxz}$  | $-4.783 \times 10^{-28}$ | $-2.643 \times 10^{-28}$ | $-2.336 \times 10^{-28}$ | $-2.732 \times 10^{-28}$ | $-2.874 \times 10^{-28}$ | $1.869 \times 10^{-28}$  | $5.380 \times 10^{-29}$  | $1.022 \times 10^{-28}$  |
| $\beta_{yyz}$  | $-1.979 \times 10^{-29}$ | $-1.893 \times 10^{-29}$ | $-2.035 \times 10^{-29}$ | $-2.103 \times 10^{-29}$ | $-2.054 \times 10^{-29}$ | $-3.242 \times 10^{-30}$ | $-1.956 \times 10^{-30}$ | $-1.231 \times 10^{-30}$ |
| $\beta_{xzz}$  | $-8.978 \times 10^{-30}$ | $-2.249 \times 10^{-29}$ | $-1.631 \times 10^{-29}$ | $-2.097 \times 10^{-29}$ | $-2.346 \times 10^{-29}$ | $1.198 \times 10^{-31}$  | $-2.475 \times 10^{-30}$ | $1.176 \times 10^{-31}$  |
| $\beta_{yzz}$  | $1.268 \times 10^{-29}$  | $7.243 \times 10^{-30}$  | $6.276 \times 10^{-30}$  | $7.221 \times 10^{-30}$  | $7.292 \times 10^{-30}$  | $-5.812 \times 10^{-31}$ | $7.720 \times 10^{-31}$  | $1.415 \times 10^{-30}$  |
| $\beta_{zzz}$  | $-6.810 \times 10^{-30}$ | $-4.189 \times 10^{-30}$ | $-2.865 \times 10^{-30}$ | $-3.857 \times 10^{-30}$ | $-4.593 \times 10^{-30}$ | $2.680 \times 10^{-30}$  | $2.957 \times 10^{-30}$  | $3.140 \times 10^{-30}$  |
| $\beta_{tot}$  | $0.817 \times 10^{-27}$  | $3.205 \times 10^{-27}$  | $3.224 \times 10^{-27}$  | $3.475 \times 10^{-27}$  | $3.628 \times 10^{-27}$  | $4.469 \times 10^{-27}$  | $0.772 \times 10^{-27}$  | $1.476 \times 10^{-27}$  |

**Table S23:** The average second hyperpolarizability ( $\gamma$  in  $esu$ ) and its major contributing tensor components noticed for all nominated molecules.

| <b>Compounds</b> | $\gamma_x \times 10^{-32}$ | $\gamma_y \times 10^{-34}$ | $\gamma_z \times 10^{-34}$ | $\gamma_{tot} \times 10^{-32}$ |
|------------------|----------------------------|----------------------------|----------------------------|--------------------------------|
| <b>PMD-1</b>     | 7.221                      | 4.150                      | 3.332                      | 7.295                          |
| <b>PMDC2</b>     | 3.758                      | 3.373                      | 2.721                      | 3.819                          |
| <b>PMDC3</b>     | 3.764                      | 3.166                      | 2.257                      | 3.818                          |
| <b>PMDC4</b>     | 4.062                      | 3.018                      | 2.651                      | 4.119                          |
| <b>PMDC5</b>     | 4.266                      | 3.226                      | 2.925                      | 4.328                          |
| <b>PMDC6</b>     | 5.555                      | 3.483                      | 1.042                      | 5.600                          |
| <b>PMDC7</b>     | 1.428                      | 2.522                      | 0.680                      | 1.460                          |
| <b>PMDC8</b>     | 1.865                      | 2.622                      | 0.899                      | 1.900                          |

**Table S24:** The IUPAC names and abbreviations of investigated compounds.

| Compound     | IUPAC name                                                                                                                                                                                                                                                                                                                                                       |
|--------------|------------------------------------------------------------------------------------------------------------------------------------------------------------------------------------------------------------------------------------------------------------------------------------------------------------------------------------------------------------------|
| <b>PMD-1</b> | 2,2'-((2 <i>Z</i> ,2' <i>Z</i> )-((6,6'-(2,5-diisobutoxy-1,4-phenylene)bis(4,4-dimethyl-4 <i>H</i> -cyclopenta[1,2- <i>b</i> :5,4- <i>b</i> ']dithiophene-6,2-diyl))bis(methanylylidene))bis(5,6-difluoro-3-oxo-2,3-dihydro-1 <i>H</i> -indene-2,1-diylidene))dimalononitrile                                                                                    |
| <b>PMDC2</b> | ( <i>Z</i> )-2-(2-(((6-(4-(6-(9 <i>H</i> -carbazol-9-yl)-4-methyl-4 <i>H</i> -cyclopenta[1,2- <i>b</i> :5,4- <i>b</i> ']dithiophen-2-yl)-2,5-diisobutoxyphenyl)-4-methyl-4 <i>H</i> -cyclopenta[1,2- <i>b</i> :5,4- <i>b</i> ']dithiophen-2-yl)methylene)-5,6-difluoro-3-oxo-2,3-dihydro-1 <i>H</i> -inden-1-ylidene)malononitrile                               |
| <b>PMDC3</b> | ( <i>E</i> )-2-(5-(((6-(4-(6-(9 <i>H</i> -carbazol-9-yl)-4,4-dimethyl-4 <i>H</i> -cyclopenta[1,2- <i>b</i> :5,4- <i>b</i> ']dithiophen-2-yl)-2,5-diisobutoxyphenyl)-4,4-dimethyl-4 <i>H</i> -cyclopenta[1,2- <i>b</i> :5,4- <i>b</i> ']dithiophen-2-yl)methylene)-6-oxo-5,6-dihydro-4 <i>H</i> -cyclopenta[ <i>c</i> ]thiophene-4-ylidene)malononitrile          |
| <b>PMDC4</b> | ( <i>E</i> )-2-(5-(((6-(4-(6-(9 <i>H</i> -carbazol-9-yl)-4,4-dimethyl-4 <i>H</i> -cyclopenta[1,2- <i>b</i> :5,4- <i>b</i> ']dithiophen-2-yl)-2,5-diisobutoxyphenyl)-4,4-dimethyl-4 <i>H</i> -cyclopenta[1,2- <i>b</i> :5,4- <i>b</i> ']dithiophen-2-yl)methylene)-1-fluoro-6-oxo-5,6-dihydro-4 <i>H</i> -cyclopenta[ <i>c</i> ]thiophene-4-ylidene)malononitrile |
| <b>PMDC5</b> | ( <i>E</i> )-2-(5-(((6-(4-(6-(9 <i>H</i> -carbazol-9-yl)-4,4-dimethyl-4 <i>H</i> -cyclopenta[1,2- <i>b</i> :5,4- <i>b</i> ']dithiophen-2-yl)-2,5-diisobutoxyphenyl)-4,4-dimethyl-4 <i>H</i> -cyclopenta[1,2- <i>b</i> :5,4- <i>b</i> ']dithiophen-2-yl)methylene)-1-chloro-6-oxo-5,6-dihydro-4 <i>H</i> -cyclopenta[ <i>c</i> ]thiophene-4-ylidene)malononitrile |
| <b>PMDC6</b> | ( <i>E</i> )-5-(((6-(4-(6-(9 <i>H</i> -carbazol-9-yl)-4,4-dimethyl-4 <i>H</i> -cyclopenta[1,2- <i>b</i> :5,4- <i>b</i> ']dithiophen-2-yl)-2,5-diisobutoxyphenyl)-4,4-dimethyl-4 <i>H</i> -cyclopenta[1,2- <i>b</i> :5,4- <i>b</i> ']dithiophen-2-yl)methylene)-3-chloro-6-(dinitromethylene)-5,6-dihydro-4 <i>H</i> -cyclopenta[ <i>c</i> ]thiophene-4-one       |
| <b>PMDC7</b> | ( <i>Z</i> )-2-(5-(((6-(4-(6-(9 <i>H</i> -carbazol-9-yl)-4,4-dimethyl-4 <i>H</i> -cyclopenta[1,2- <i>b</i> :5,4- <i>b</i> ']dithiophen-2-yl)-2,5-diisobutoxyphenyl)-4,4-dimethyl-4 <i>H</i> -cyclopenta[1,2- <i>b</i> :5,4- <i>b</i> ']dithiophen-2-yl)methylene)-3-methyl-4-methylenethiazolidin-2-ylidene)malononitrile                                        |

**PMDC8** (Z)-5-((6-(4-(6-(9H-carbazol-9-yl)-4,4-dimethyl-4H-cyclopenta[1,2-b:5,4-b']dithiophen-2-yl)-2,5-diisobutoxyphenyl)-4,4-dimethyl-4H-cyclopenta[1,2-b:5,4-b']dithiophen-2-yl)methylene)-3-methyl-2-thioxothiazolidin-4-one

**Table S25:** The GRPs of **PMD-1** and **PMDC2-PMDC8**

| Compounds    | <i>IP</i> | <i>EA</i> | <i>X</i> | $\eta$ | $\sigma$ | $\mu$   | $\omega$ |
|--------------|-----------|-----------|----------|--------|----------|---------|----------|
| <b>PMD-1</b> | 0.2049    | 0.1266    | 0.1657   | 0.0392 | 12.7693  | -0.1657 | 0.3507   |
| <b>PMDC2</b> | 0.1987    | 0.1223    | 0.1605   | 0.0382 | 13.0887  | -0.1605 | 0.3373   |
| <b>PMDC3</b> | 0.1983    | 0.1210    | 0.1597   | 0.0386 | 12.9393  | -0.1597 | 0.3298   |
| <b>PMDC4</b> | 0.1988    | 0.1229    | 0.1609   | 0.0379 | 13.1774  | -0.1609 | 0.3410   |
| <b>PMDC5</b> | 0.1989    | 0.1233    | 0.1611   | 0.0378 | 13.2158  | -0.1611 | 0.3430   |
| <b>PMDC6</b> | 0.1995    | 0.1259    | 0.1627   | 0.0368 | 13.5785  | -0.1627 | 0.3596   |
| <b>PMDC7</b> | 0.1908    | 0.0932    | 0.1420   | 0.0488 | 10.2453  | -0.1420 | 0.2066   |
| <b>PMDC8</b> | 0.1950    | 0.1037    | 0.1494   | 0.0457 | 10.9502  | -0.1494 | 0.2443   |

Units in Hartree ( $E_h$ )

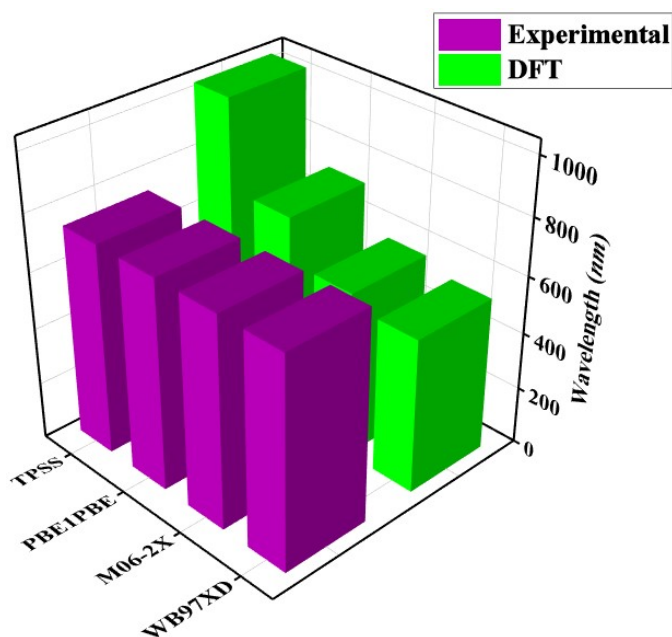

**Figure S1:** Comparison between DFT and experimental UV-Vis results of **PMD-1** at various functionals in dichloromethane (DCM) solvent

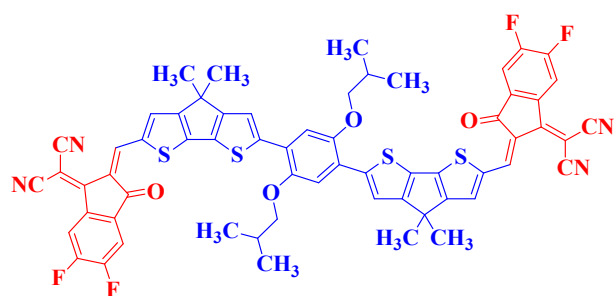

**PMD-1**

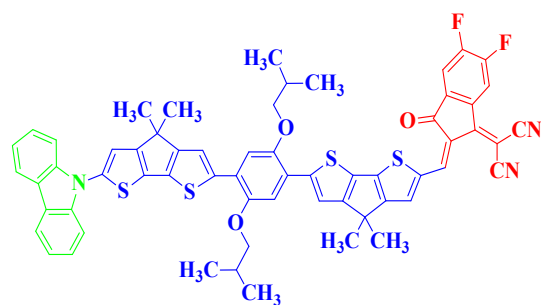

**PMDC2**

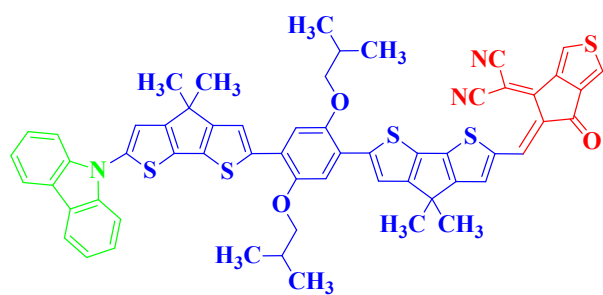

**PMDC3**

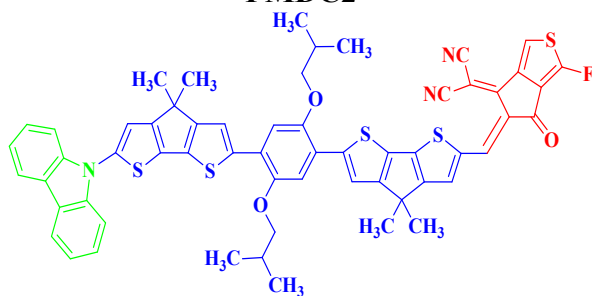

**PMDC4**

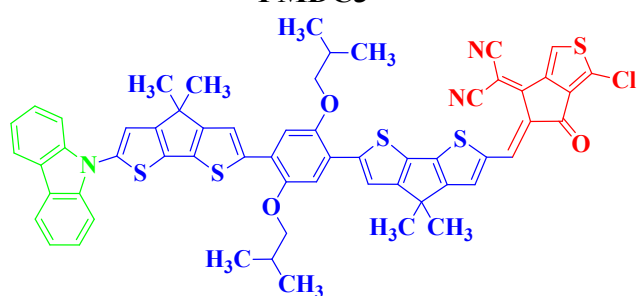

**PMDC5**

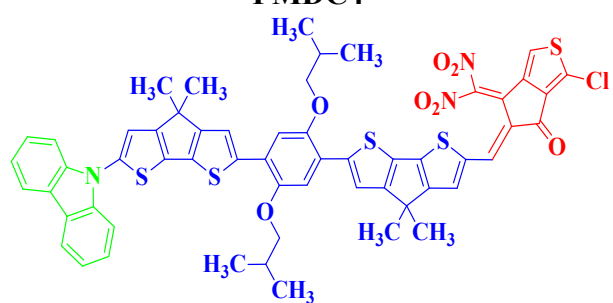

**PMDC6**

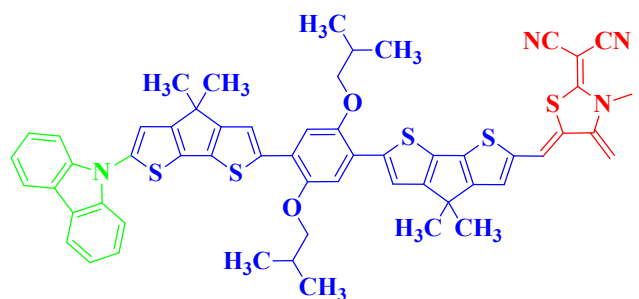

**PMDC7**

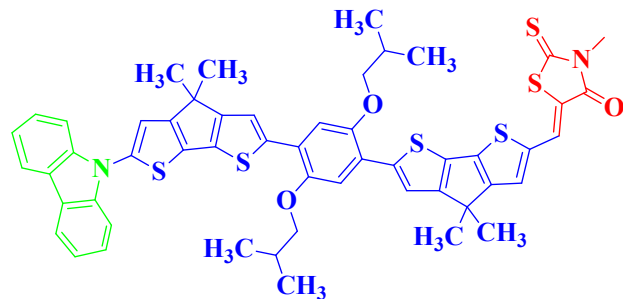

**PMDC8**

 Depicts Donor
  Depicts  $\pi$ -spacer
  Depicts Acceptor

**Figure S2:** The display of donor,  $\pi$ -spacer and acceptor structures with green, blue and red colors respectively, in **PMD-1** and its derivatives (**PMDC2-PMDC8**).

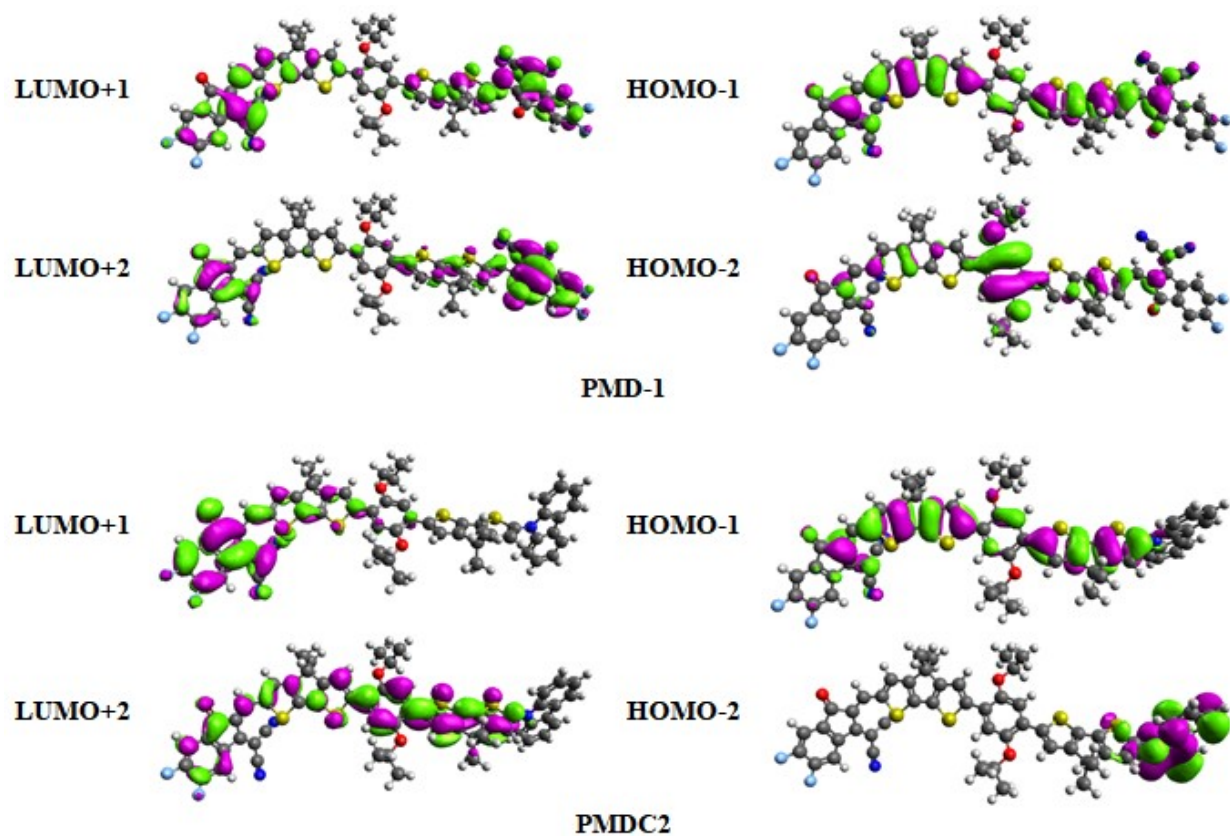

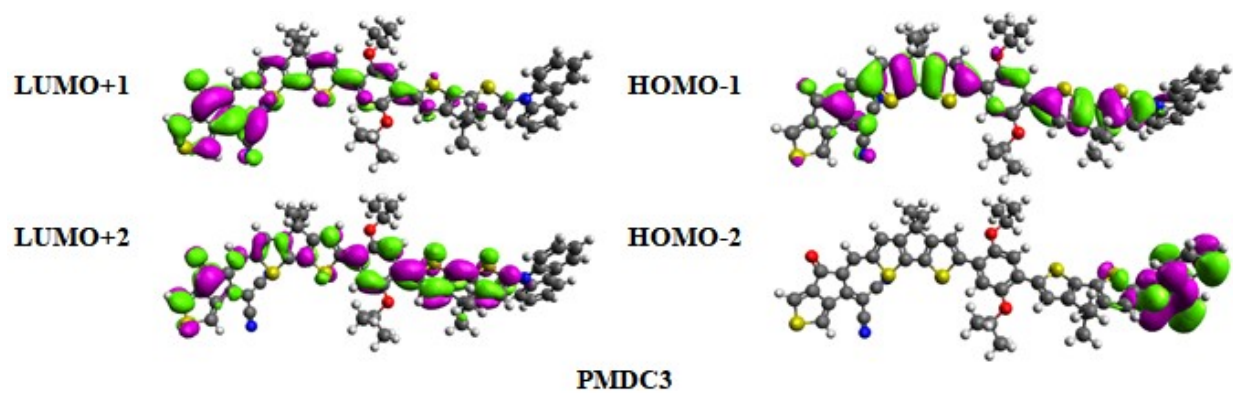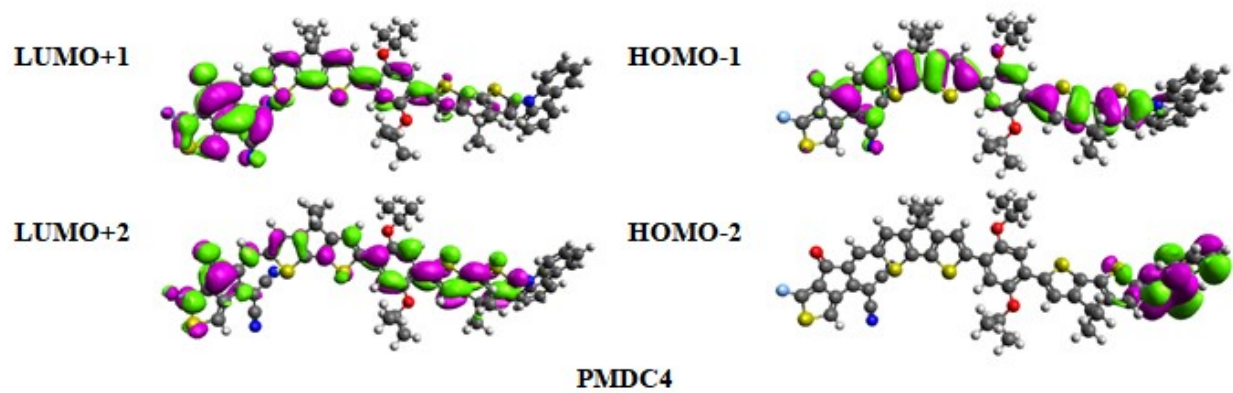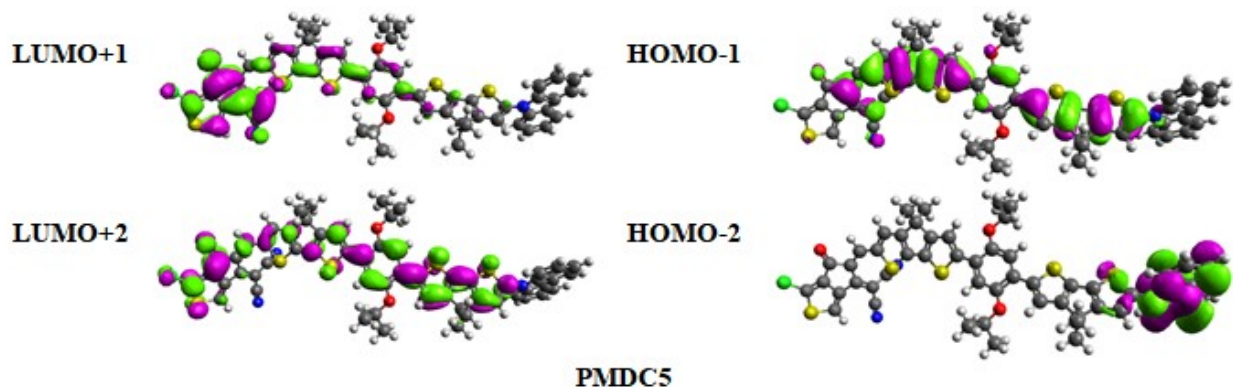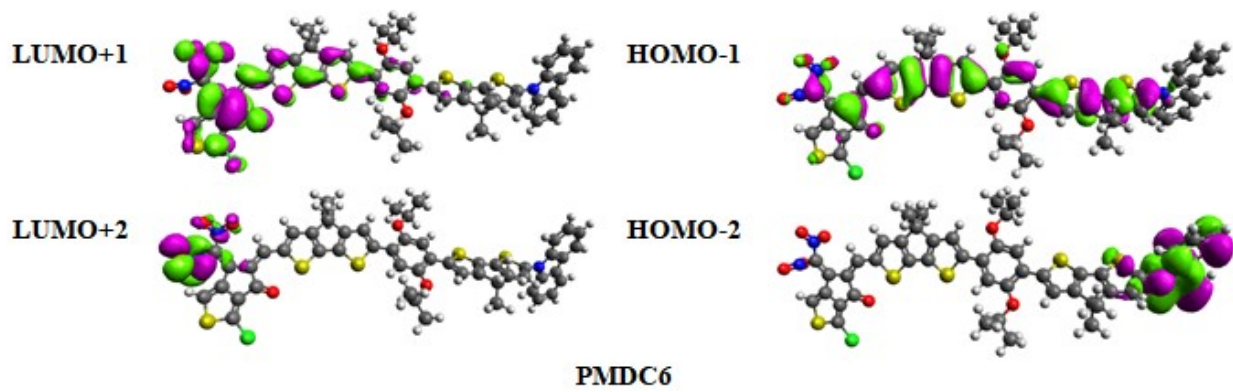



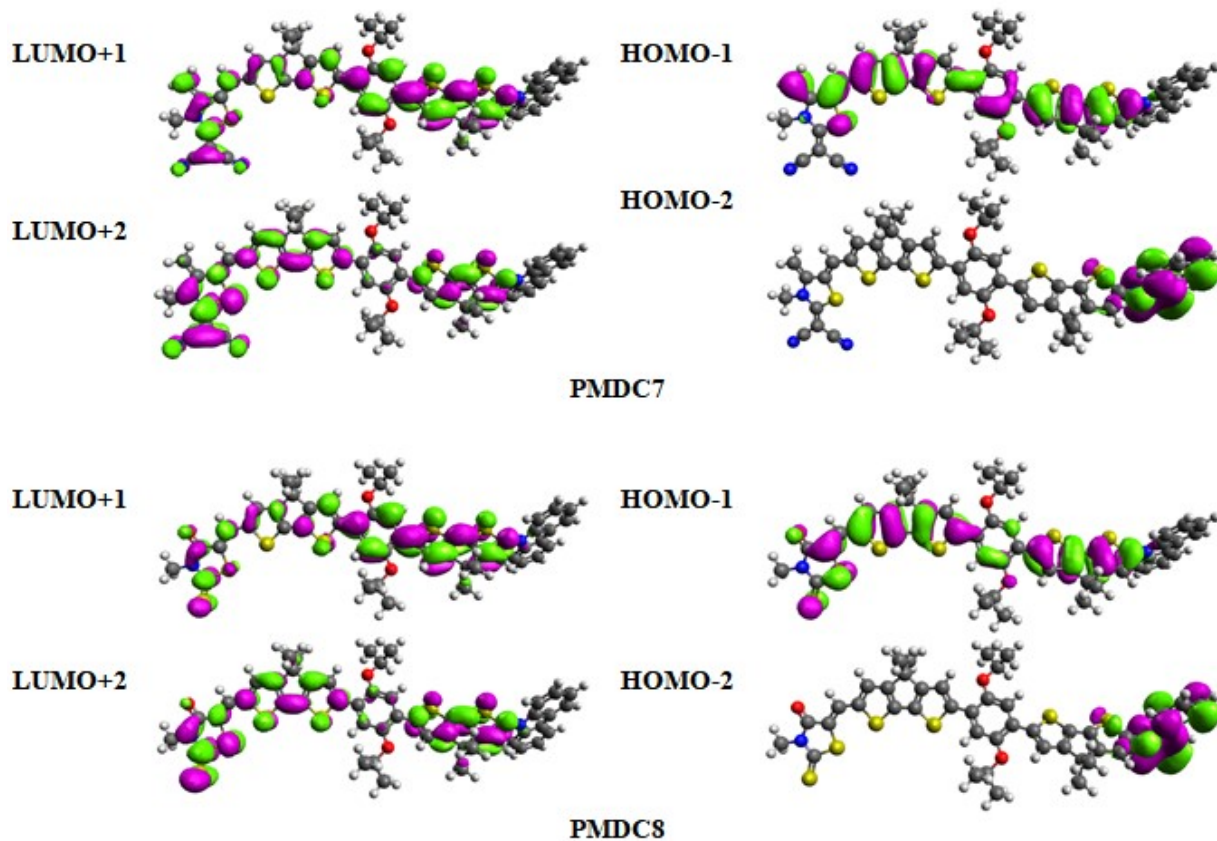

**Figure S3:** The 3D depiction of HOMO-1, LUMO+1, HOMO-2 and LUMO+2 of modified compound (PMD-1 and PMDC2-PMDC8).

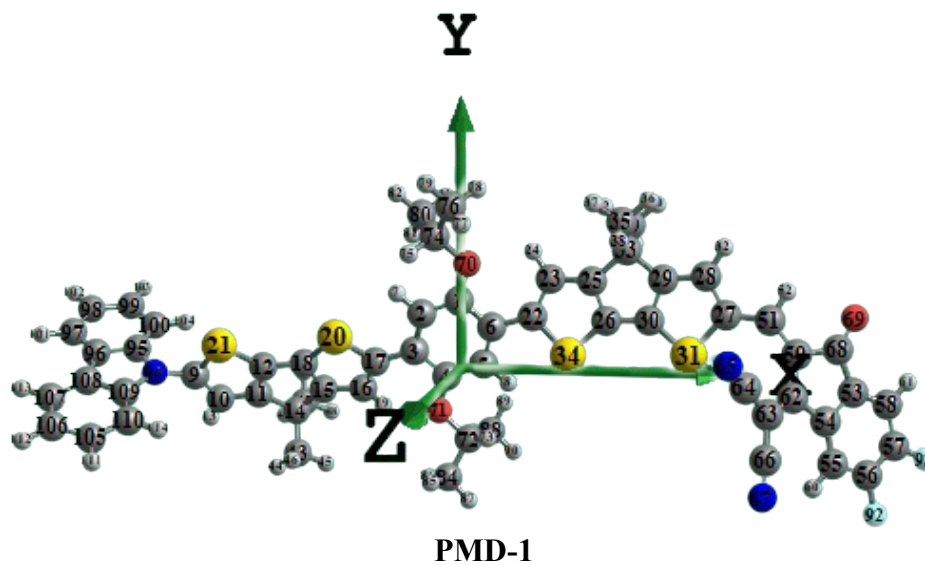

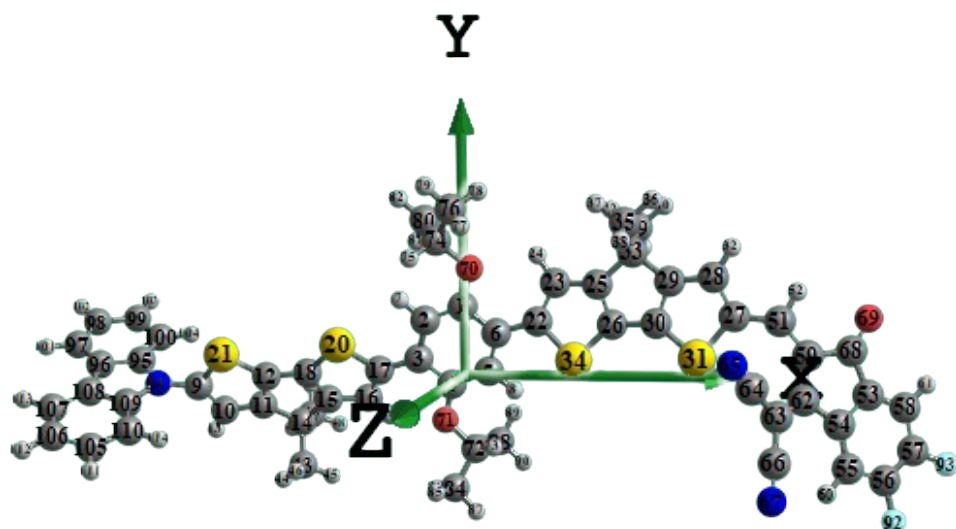

PMDC2  
Y

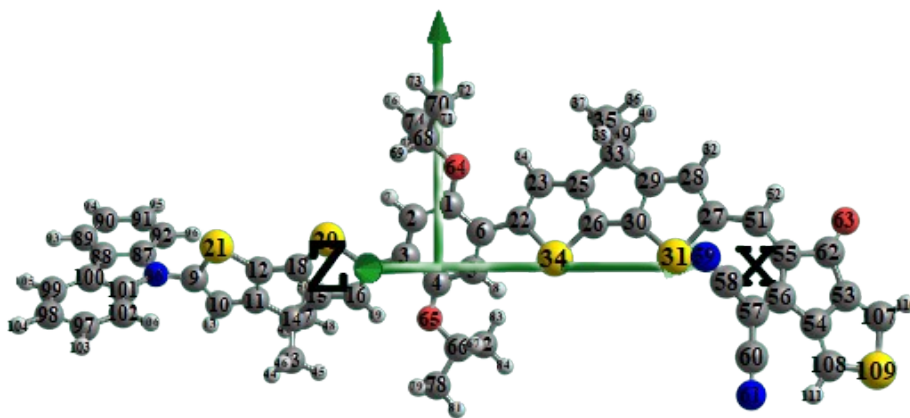

PMDC3  
Y

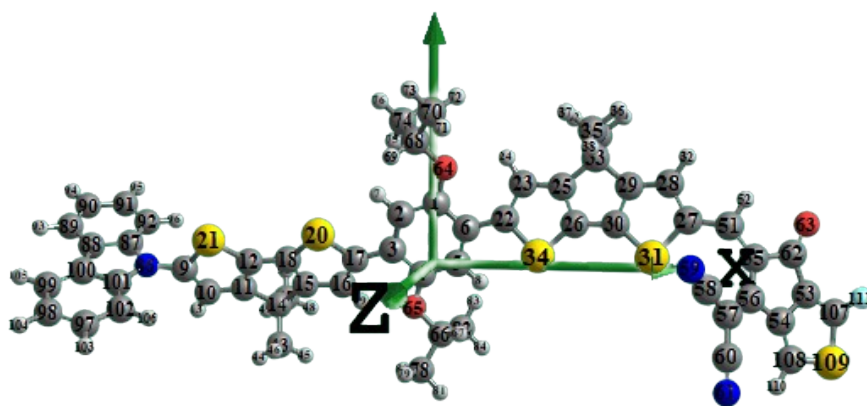

PMDC4

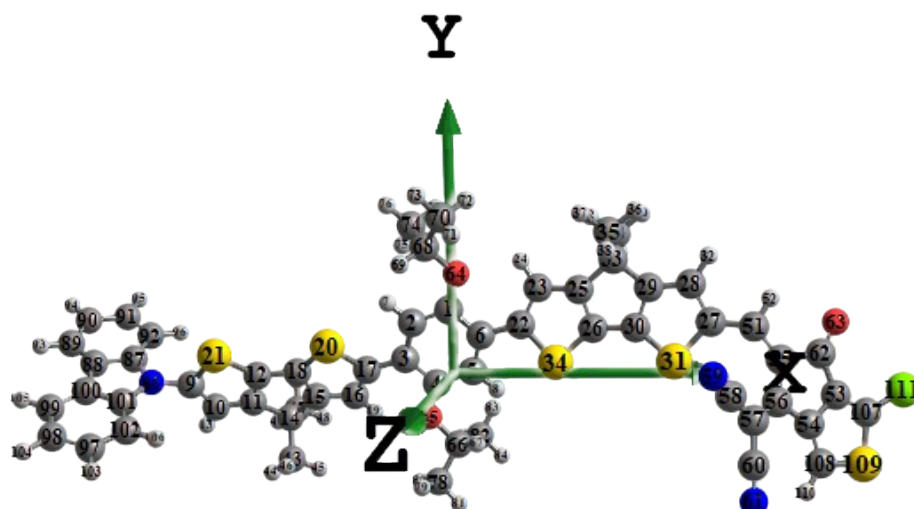

PMDC5

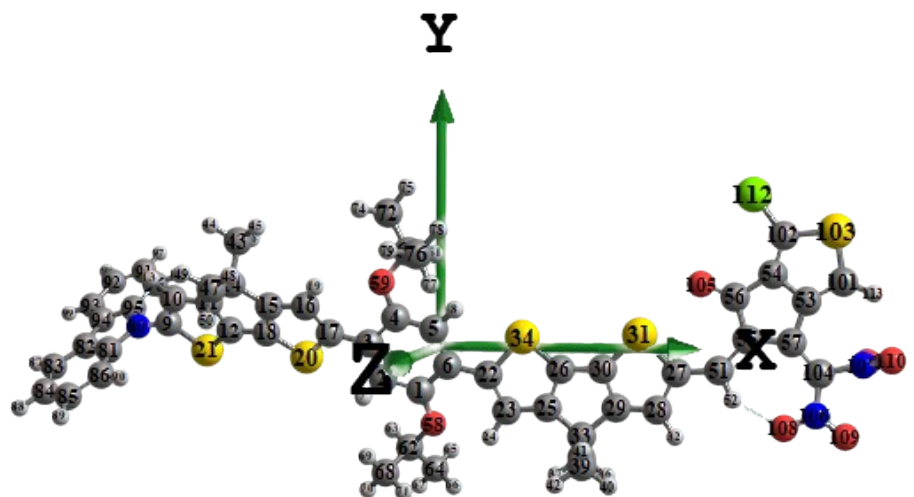

PMDC6

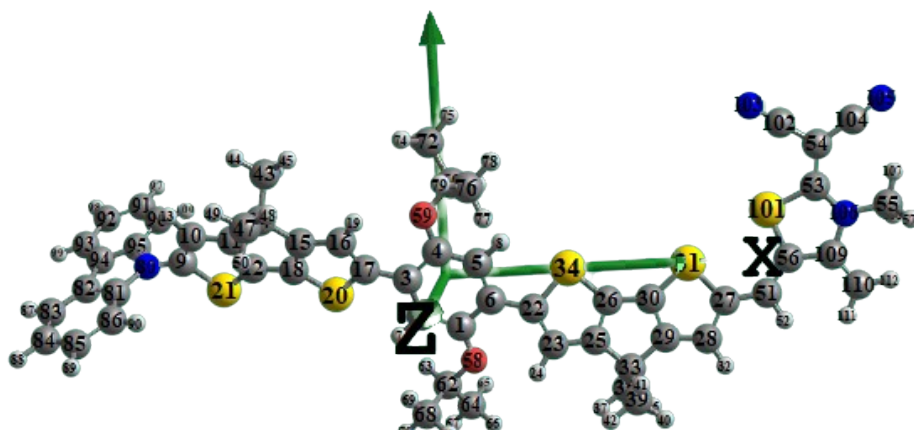

PMDC7

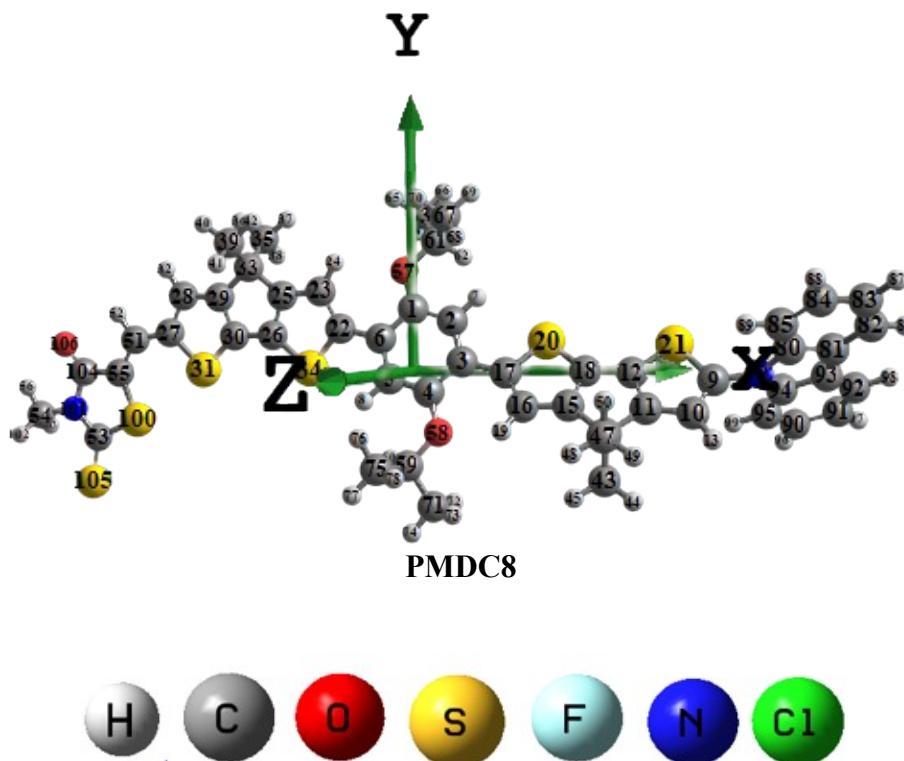

**Figure S4:** The optimized structures of all theoretically designed compounds.

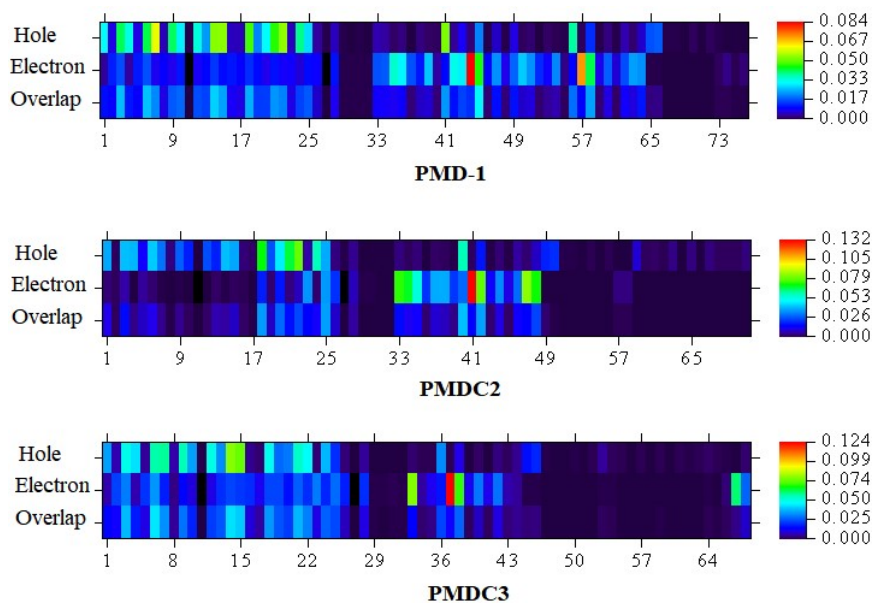

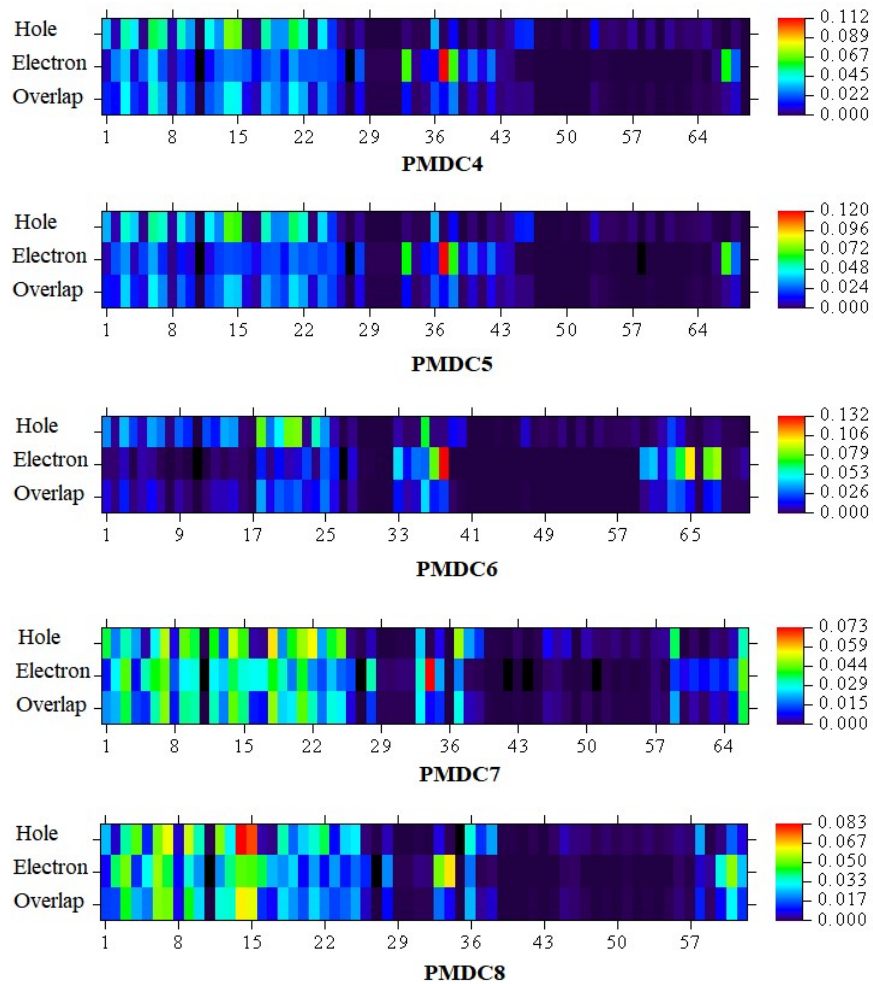

**Figure S5.** Pictorial representation of hole-electron transport analysis

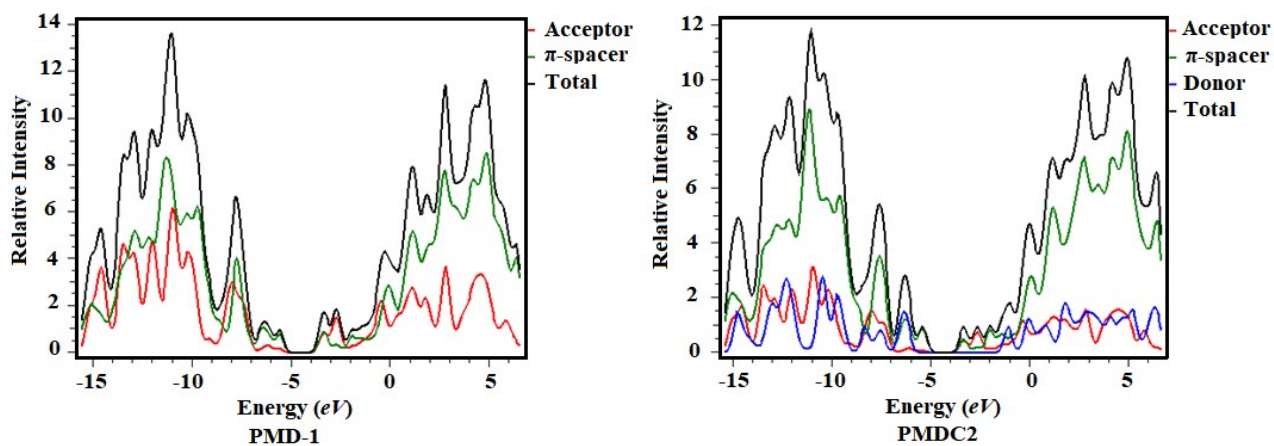

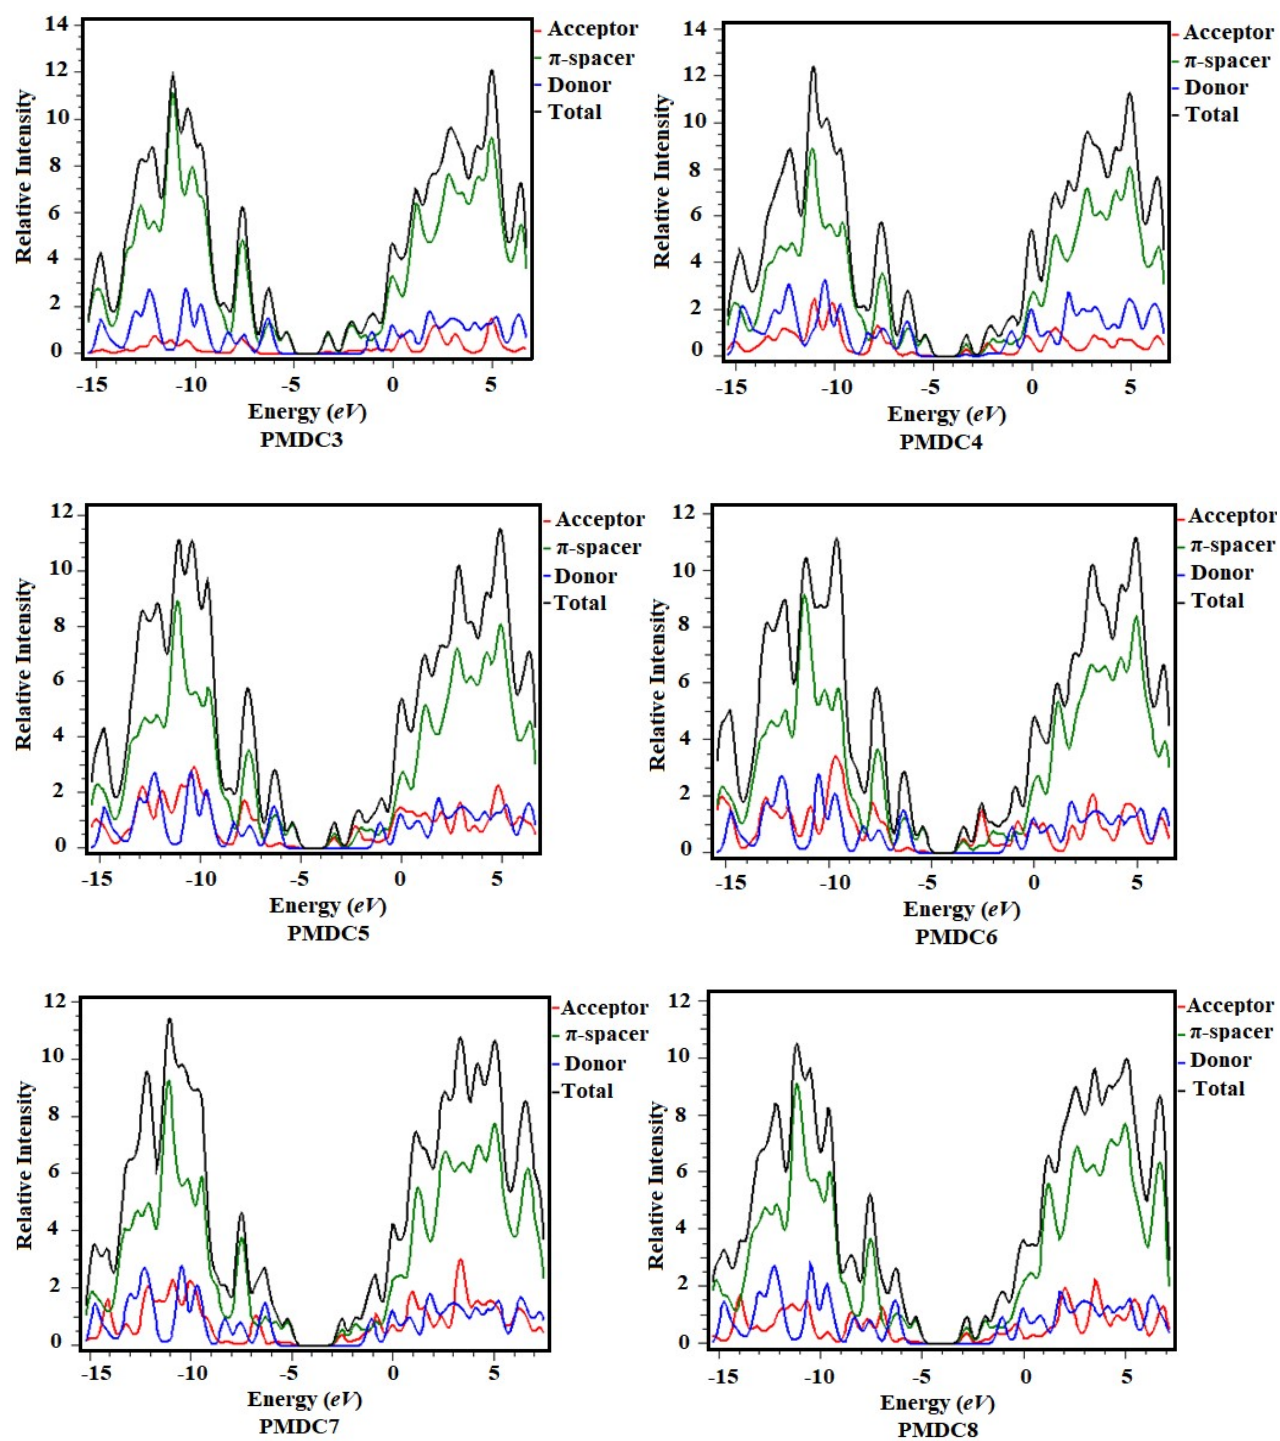

Figure S6: DOS pictographs of the PMD-1 and PMDC2-PMDC8.

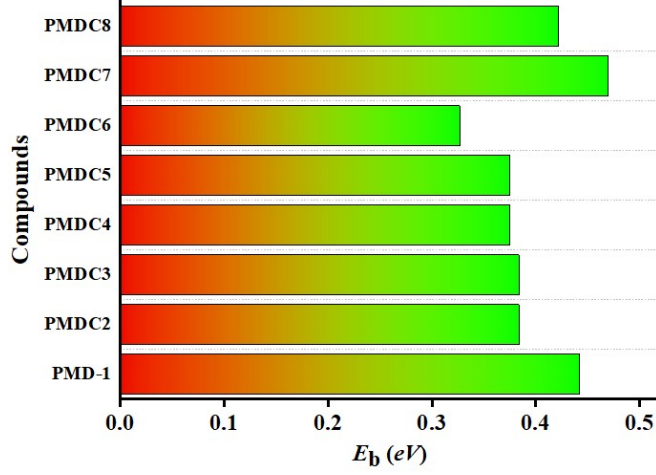

**Figure S7:** Graphical representation of the binding energies of **PMD-1** and its derivatives

$$\mu = (\mu_x^2 + \mu_y^2 + \mu_z^2)^{1/2} \quad (\text{Equation S1})$$

$$\langle a \rangle = (a_{xx} + a_{yy} + a_{zz})/3 \quad (\text{Equation S2})$$

$$\beta_{\text{tot}} = (\beta_x^2 + \beta_y^2 + \beta_z^2)^{1/2} \quad (\text{Equation S3})$$

Where  $\beta_x = \beta_{xxx} + \beta_{xyy} + \beta_{xzz}$ ;  $\beta_y = \beta_{yxx} + \beta_{yyy} + \beta_{yzz}$  and  $\beta_z = \beta_{zxx} + \beta_{zyy} + \beta_{zzz}$ .

$$\gamma_{\text{tot}} = \sqrt{\gamma_x^2 + \gamma_y^2 + \gamma_z^2} \quad (\text{Equation S4})$$

Where 
$$\gamma_i = \frac{1}{15} \sum_j (\gamma_{ijji} + \gamma_{ijij} + \gamma_{iijj}) \quad i, j = \{x, y, z\}$$
